# Supplementary material
Source: PubMed Central journal article supplement (PMC6172658)
Supplement: NIHMS1507288-supplement-Supplement1.pdf [file NIHMS1507288-supplement-Supplement1.pdf]

## Supplementary Appendix

This appendix has been provided by the authors to give readers additional information about their work.

Supplement to: Sparano JA, Gray RJ, Makower DF, et al. Adjuvant chemotherapy guided by a 21-gene expression assay in breast cancer. *N Engl J Med* 2018;379:111-21. DOI: 10.1056/NEJMoa1804710

**Supplement to: Sparano JA, Gray RJ, Makower DF, et al. Prospective trial of adjuvant chemotherapy guided by a 21-gene expression assay in breast cancer**

**Table of Contents**

|                                                                                                                                                          |    |
|----------------------------------------------------------------------------------------------------------------------------------------------------------|----|
| 1. Contributors .....                                                                                                                                    | 4  |
| 2. Eligibility criteria for pre-registration.....                                                                                                        | 11 |
| 3. Preregistration and registration.....                                                                                                                 | 11 |
| 4. Chemotherapy and endocrine therapy .....                                                                                                              | 11 |
| 5. Low-risk (RS 0-10) & high-risk (RS 26 or higher) registries and RS distribution ....                                                                  | 13 |
| 6. Statistical methods.....                                                                                                                              | 13 |
| 7. Supplemental tables 1-6 .....                                                                                                                         | 17 |
| <b>Table S1.</b> Characteristics of patients by assigned treatment in intention-to-treat population .....                                                | 17 |
| <b>Table S2.</b> Treatment administered .....                                                                                                            | 19 |
| <b>Table S3.</b> Characteristics of patients with RS 11-25 according to treatment given                                                                  | 20 |
| <b>Table S4.</b> Type of first invasive disease-free survival event by RS and assigned treatment.....                                                    | 21 |
| <b>Table S5.</b> Type of first invasive disease-free survival event by treatment received for randomized cohort with RS 11-25 .....                      | 22 |
| <b>Table S6.</b> Type of first IDFS event for randomized patients by age, RS and arm..                                                                   | 23 |
| 8. Supplemental figures 1-13.....                                                                                                                        | 24 |
| <b>Figure S1.</b> Duration of endocrine therapy by treatment arm in the RS 11 to 25 group in the intention-to-treat population (assigned treatment)..... | 24 |
| .....                                                                                                                                                    | 25 |
| <b>Figure S2a-b.</b> Recurrence Score 11 to 25: Clinical Outcomes by Assigned Treatment Arm.....                                                         | 25 |
| <b>Figure S3.</b> Clinical outcomes in RS 11-25 population by treatment received (as-treated analysis). .....                                            | 26 |
| <b>Figure S4.</b> Clinical outcomes by assigned treatment in Arms A-D (intention-to-treat analysis).....                                                 | 27 |
| <b>Figures S5-10.</b> Rate of Distant Recurrence by Recurrence Score as a Continuous Function.....                                                       | 28 |
| <b>Figure S5.</b> Continuous RS 11-25, distant recurrence, and assigned treatment.....                                                                   | 29 |
| <b>Figure S6.</b> Continuous RS 11-25, distant recurrence, and treatment given (as-treated analysis). .....                                              | 30 |
| <b>Figure S7.</b> Continuous RS 11-25 and distant recurrence unadjusted for other factors (treatment assigned and treatment given). .....                | 31 |

|                                                                                                                                                                                                                                                                                    |    |
|------------------------------------------------------------------------------------------------------------------------------------------------------------------------------------------------------------------------------------------------------------------------------------|----|
| <b>Figure S8.</b> Continuous RS 11-25 and distant recurrence by age ( $\leq 50$ vs. $> 50$ years). 9-year distant recurrence rates by treatment arm assignment, RS, and age (RS modeled with a natural spline with 2 degrees of freedom, adjusted for tumor size and grade). ..... | 32 |
| <b>Figure S9.</b> Continuous RS and distant recurrence in all treatment arms (by assigned treatment and treatment given). .....                                                                                                                                                    | 33 |
| <b>Figure S10.</b> Continuous RS and distant recurrence in all assigned treatment arms by age ( $\leq 50$ years vs. $> 50$ years). .....                                                                                                                                           | 34 |
| <b>Figure S11.</b> Recurrence Score 11 to 25: Subgroup Analysis for Comparison of Assigned Treatment Arms. ....                                                                                                                                                                    | 35 |
| <b>Figure S12.</b> Invasive disease-free survival for premenopausal women with RS 11-15, 16-20, and 21-25 by assigned treatment (intention-to-treat analysis) Kaplan Meier estimates by treatment arm for arm B (endocrine therapy alone) and arm C (chemoendocrine therapy). .... | 37 |
| <b>Figure S13.</b> Invasive disease-free survival for women $\leq 50$ years by assigned treatment (intention-to-treat analysis). ....                                                                                                                                              | 38 |

## 1. Contributors

### Institution Name

Abbott Northwestern Hospital  
Advocate Lutheran General Hospital  
Albert Einstein College of Medicine  
Allan Blair Cancer Centre  
Allegheny General Hospital  
Augusta University Medical Center  
Australian New Zealand Breast CTG  
Baptist Health Cancer Research Network  
Baptist Health Lexington  
Bay Area Tumor Institute  
Baylor College of Medicine  
BCCA-Cancer Centre for the Southern Interior  
BCCA-Fraser Valley Cancer Centre  
BCCA-Vancouver Cancer Centre  
BCCA-Vancouver Island Cancer Centre  
Berkshire Hematology Oncology PC  
Beth Israel Deaconess Medical Center  
Brooke Army Medical Center  
Cancer Alliance of Nebraska  
Cancer Care Specialists of Central Illinois  
Cancer Center of Kansas  
Cancer Center of Santa Barbara  
Cancer Trials Ireland  
CancerCare Manitoba  
Capital Region Radiation Oncology Center  
Carle Cancer Center  
Carolinas Medical Center/Levine Cancer Institute  
Case Western Reserve University  
Case Western Reserve University  
Case Western Reserve University  
Cedar Rapids Oncology Associates  
Christiana Care Health System-Christiana Hospital  
CHUM-Hotel Dieu du Montreal  
City of Hope Comprehensive Cancer Center  
Cleveland Clinic Foundation  
Coborn Cancer Center at Saint Cloud Hospital  
Columbia Saint Mary's Water Tower Medical Commons  
Columbia University Medical Center  
Covenant Medical Center-Lakeside  
CoxHealth South Hospital  
CoxHealth South Hospital  
Credit Valley Hospital  
Creighton University Medical Center  
CSSS Champlain-Charles Le Moyne

### Principal Investigator

Patrick Flynn  
Sigrun Hallmeyer  
Joseph Sparano  
Muhammad Salim  
Thomas Julian  
Sharad Ghamande  
Janine Lombard  
Elvis Donaldson  
Lee G. Hicks  
James Feusner  
Mothaffar Rimawi  
Barbara Czerkawski  
Lee Ann Martin  
Stephen Chia  
Vanessa Bernstein  
Harvey Zimble  
Michael Atkins  
Lindsey J. Graham  
Gamini Soori  
James Wade  
Shaker Dakhil  
Frederick Kass  
Sean McDermott  
Lorne Brandes  
James L. Wade, III  
Kendrith Rowland  
Antoinette Tan  
Bruce Averbook  
Edward Mansour  
Steven Waggoner  
Martin Wiesenfeld  
Stephen Grubbs  
Andre Robidoux  
Joanne E. Mortimer  
Robert Dreicer  
Donald Jurgens  
Craig Schulz  
Daniel Petrylak  
Ibrahim Shalaby  
J. Wendall Goodwin  
Robert L. Carolla  
Robert Myers  
James A. Mailliard  
Catherine Prady

Dana-Farber / Partners CancerCare  
Dana-Farber/Harvard Cancer Center  
Dartmouth College - Norris Cotton Cancer Center  
Dartmouth Hitchcock Medical Center  
Dartmouth Hitchcock Medical Center  
Dayton Physicians LLC-Samaritan North  
Desert Regional Medical Center  
Doctor's Hospital of Laredo  
Duke University - Duke Cancer Institute  
Eastern Maine Medical Center  
Eastern Maine Medical Center Cancer Care  
Edward Hospital/Cancer Center  
Edwards Comprehensive Cancer Center  
Emory University/Winship Cancer Institute  
Emory University/Winship Cancer Institute  
Essentia Health Cancer Center  
Florida Cancer Specialists - Sarasota Downtown  
Fox Chase Cancer Center  
Froedtert and the Medical College of Wisconsin  
Froedtert and the Medical College of Wisconsin  
Froedtert and the Medical College of Wisconsin  
Geisinger Wyoming Valley/Henry Cancer Center  
Georgia Regents University  
Glens Falls Hospital  
Good Samaritan Hospital - Cincinnati  
Greenville Health System Cancer Institute-Eastside  
Grupo de Estudios Clinicos Oncologicos del Peru  
Halifax Health Medical Center-Cente  
Hartford Hospital  
Health Sciences North  
Hematology Oncology Associates of Central New York  
Henry Ford Hospital  
Hopital Maisonneuve-Rosemont  
Horizon Health Network-Saint John Regional Hospital  
Huntsman Cancer Institute/University of Utah  
Illinois Oncology Research Associates  
Indiana Univ/Melvin and Bren Simon Cancer Center  
Intermountain Medical Center  
Iowa Oncology Research Associates  
Iowa Oncology Research Associates  
JHU Sidney Kimmel Comprehensive Cancer Center  
John H Stroger Hospital of Cook County  
John H Stroger Hospital of Cook County  
John Muir Medical Center-Concord Campus  
Johns Hopkins University/Sidney Kimmel Cancer Center  
Johns Hopkins University/Sidney Kimmel Cancer Center

Harold Burstein  
Ursula Matulonis  
Konstantin Dragnev  
Lesley Jarvis  
Mary Chamberlin  
Howard Gross  
Elber Camacho  
Eduardo Miranda  
Jeffrey Crawford  
Sheila Pascual  
Thomas Openshaw  
Alexander Hantel  
Maria Tria Tirona  
Charles Staley  
William Wood  
Daniel Nikceovich  
Fadi Kayali  
Lori Goldstein  
Tina Yen  
Elizabeth Gore  
Paul S. Ritch  
Srilatha Hosur  
Anand Jillella  
Robert Sponzo  
Kevin Grannan  
Jeffrey K. Giguere  
Carlos Vallejos Sologuren  
Herbert Keman  
Patricia DeFusco  
Pedro Lopez  
Jeffrey Kirshner  
Robert A. Chapman  
Pierre Dube  
Margot Burnell  
John H. Ward  
John Kugler  
Patrick Loehrer  
Craig Nichols  
Robert Behrens  
Roscoe Morton  
Lisa Jacobs  
Howard Zaren  
Thomas Lad  
Robert L. Robles  
Arlene Forastiere  
Deborah Armstrong

|                                                         |                            |
|---------------------------------------------------------|----------------------------|
| Kaiser Permanente                                       | Louis Fehrenbacher         |
| Kansas Institute of Medicine Cancer and Blood Center    | Rakesh Gaur                |
| Lankenau Hospital                                       | Paul Gilman                |
| Laura and Issac Perlmutter Cancer Center at NYU Langone | Deirdre Cohen              |
| Laura and Issac Perlmutter Cancer Center at NYU Langone | Howard Hochster            |
| Le centre hosp affilie univ de Quebec-St Sacrement      | Christine Desbiens         |
| Louisiana State University Health Sciences Center       | Glen M. Mills              |
| Louisiana State University Medical Center               | Jill Gilbert               |
| Louisiana State University Medical Center               | Rajasekharan (Raj) Warriar |
| Louisiana State University Medical Center               | Robert Veith               |
| Loyola University Medical Center                        | Patrick J. Stiff           |
| Lynn Regional Cancer Center                             | Charles Vogel              |
| M D Anderson Cancer Center                              | Scott M. Lippman           |
| M D Anderson Cancer Center                              | Jack Phan                  |
| M D Anderson Cancer Center                              | Roy S. Herbst              |
| Marin General Hospital                                  | Peter D. Eisenberg         |
| Marshfield Clinic                                       | Matthias Weiss             |
| Marshfield Clinic                                       | Tarit Kumar Banerjee       |
| Massachusetts General Hospital                          | Donald Lawrence            |
| Mayo Clinic                                             | Kurt Jaeckle               |
| Mayo Clinic                                             | Gretchen Glaser            |
| Mayo Clinic                                             | Thomas Habermann           |
| McGill University Department of Oncology                | Wilson Miller              |
| Medical University of South Carolina                    | Robert K. Stuart           |
| MedStar Franklin Square Medical Center                  | Edward McCarron            |
| MedStar Georgetown University Hospital                  | Sonia Reichert             |
| Meharry Medical College                                 | Steven Wolff               |
| Memorial Hospital of South Bend                         | Bilal Ansari               |
| Memorial Hospital of South Bend                         | Jose Bufill                |
| Memorial Hospital of South Bend                         | Rafat Ansari               |
| Memorial Sloan-Kettering Cancer Center                  | Michael Morris             |
| Mercy Cancer Center                                     | Sonia Reichert             |
| Mercy Clinic Cancer and Hematology                      | Jay Carlson                |
| Metairie Oncologists LLC                                | Jayne Gurtler              |
| Michigan State University Clinical Center               | Deimante Tamkus            |
| Missouri Baptist Medical Center                         | Bryan A. Faller            |
| Moffitt Cancer Center                                   | Hugo Fernandez             |
| Montefiore Medical Center                               | Peter Wiernik              |
| Mount Sinai Hospital                                    | Lewis Silverman            |
| Mount Sinai Medical Center                              | Michael Schwartz           |
| MultiCare Gig Harbor Medical Park                       | John Keech                 |
| Natalie Warren Bryant Cancer Center at Saint Francis    | James Lockhart             |
| Nevada Cancer Research Foundation                       | John Ellerton              |
| New Hampshire Oncology Hematology PA-Hooksett           | Douglas Weckstein          |
| Newark Beth Israel Medical Center                       | Lori Schleicher            |
| Northeast Georgia Medical Center-Gainesville            | Kendal Dixon               |

|                                                          |                          |
|----------------------------------------------------------|--------------------------|
| Northeast Radiation Oncology Center                      | Christopher Peters       |
| NorthShore University HealthSystem-Evanston Hospital     | David Grinblatt          |
| NorthShore University HealthSystem-Evanston Hospital     | Gershon Locker           |
| Northside Hospital                                       | Guilherme H.C. Cantuaria |
| Northwell Health/Center for Advanced Medicine            | Daniel Budman            |
| Northwell Health/Center for Advanced Medicine            | Lora Weiselberg          |
| Northwestern University                                  | Al Benson                |
| Northwestern University                                  | Eric Donnelly            |
| Ochsner Clinic                                           | Carl Kardinal            |
| Ochsner Clinic                                           | Jyotsna Fuloria          |
| Odette Cancer Center - Sunnybrook Health Sciences Center | Rebecca Dent             |
| Ohio State University Comprehensive Cancer Center        | Claire Verschraegen      |
| Oncology Hematology Care Inc-Blue Ash                    | Patrick Ward             |
| Oregon Health and Science University                     | Christopher W. Ryan      |
| Palo Verde Cancer Specialists                            | Lawrence Kasper          |
| Penn State Milton S Hershey Medical Center               | Witold Rybka             |
| Penticton Regional Hospital                              | Deepu Mirchandani        |
| Presbyterian - Saint Lukes Medical Center - Health One   | Eduardo Pajon            |
| Princeton Community Hospital                             | Rowena Gonzales-Chambers |
| Providence Hospital                                      | Anibal Drelichman        |
| Providence Hospital                                      | Michael Meshad           |
| Providence Saint Vincent Medical Center                  | Alison Conlin            |
| Rhode Island Hospital                                    | Howard Safran            |
| Riverside Methodist Hospital                             | John Kuebler             |
| Rocky Mountain Oncology                                  | Benjamin T. Marchello    |
| Roswell Park Cancer Institute                            | Ellis Levine             |
| Rutgers Cancer Institute of New Jersey                   | Deborah Toppmeyer        |
| Rutgers Cancer Institute of New Jersey                   | Joseph Aisner            |
| Rutgers New Jersey Medical School                        | Robert Wieder            |
| Saint Joseph Hospital - Orange                           | Lawrence Wagman          |
| Saint Joseph Mercy Hospital                              | Philip Stella            |
| Saint Louis University Hospital                          | Paul J. Petruska         |
| Saint Michael's Hospital                                 | Rashida Haq              |
| Saint Vincent Hospital Cancer Center                     | Anthony Jaslowski        |
| Saint Vincent Hospital Cancer Center Green Bay           | Gerald Kurt Bayer        |
| San Juan City Hospital                                   | Luis Baez-Diaz           |
| Sanford Cancer Center Oncology Clinic                    | Loren Tschetter          |
| Sanford Cancer Center Oncology Clinic                    | Maria Bell               |
| Sanford Cancer Center Oncology Clinic                    | Mirosław Mazurczak       |
| Sanford Medical Center-Fargo                             | Preston Steen            |
| Saskatoon Cancer Centre                                  | Shahid Ahmed             |
| Scott & White Memorial Hospital                          | Lucas Wong               |
| Sharp Memorial Hospital                                  | Robert Barone            |
| Sky Ridge Medical Center                                 | Keren Sturtz             |
| Southeastern Medical Oncology Center                     | James Atkins             |
| Southwestern Vermont Medical Center                      | Matthew Vernon           |

|                                                          |                              |
|----------------------------------------------------------|------------------------------|
| Spectrum Health at Butterworth Campus                    | Kathleen Yost                |
| Spectrum Health at Butterworth Campus                    | Marianne K. Melnik           |
| Stanford Cancer Institute Palo Alto                      | Harlan Pinto                 |
| Stanford Cancer Institute Palo Alto                      | Sandra Horning               |
| Stanford University                                      | Beth Beadle                  |
| State University of New York Upstate Medical University  | Stephen Graziano             |
| Staten Island University Hospital                        | Terenig Terjanian            |
| Stony Brook University Medical Center                    | Michael Pearl                |
| Sutter Cancer Research Consortium                        | Christopher Jones            |
| Swedish Medical Center-First Hill                        | Saul E. Rivkin               |
| The Community Hospital                                   | Mohamad Kassari              |
| The Moncton Hospital                                     | Hazem Assi                   |
| Thomas Jefferson University Hospital                     | Maria Werner-Wasik           |
| Thompson Cancer Survival Center                          | S. Spence McCachren          |
| Thompson Cancer Survival Center                          | Zhang Wenqing                |
| Thunder Bay Regional Health Science Centre               | Adrien Chan                  |
| Toledo Clinic Cancer Centers-Toledo                      | Rex Mowat                    |
| Toledo Clinic Cancer Centers-Toledo                      | Paul L. Schaefer             |
| Tom Baker Cancer Centre                                  | Marc Webster                 |
| Toronto East General Hospital                            | Yasmin Rahim                 |
| Trillium Health Centre-West Toronto                      | John Gapski                  |
| Trinity Cancer Care Center                               | Stephen Makoni               |
| Tufts Medical Center                                     | Frank Haluska                |
| Tufts Medical Center                                     | John Erban                   |
| Tufts Medical Center                                     | Richard Van Etten            |
| Tulane University Health Sciences Center                 | Hana F. Safah                |
| Tulane University Health Sciences Center                 | William Robinson             |
| UC Irvine Health/Chao Family Comprehensive Cancer Center | Krishnansu Tewari            |
| UC Irvine Health/Chao Family Comprehensive Cancer Center | Sai-Hong Ignatius Ou         |
| UC San Diego Moores Cancer Center                        | Barbara Parker               |
| UC San Diego Moores Cancer Center                        | Loren Mell                   |
| UCLA / Jonsson Comprehensive Cancer Center               | John A. Glaspy               |
| UCLA / Jonsson Comprehensive Cancer Center               | Robin Farias-Eisner          |
| UCSF Medical Center-Mount Zion                           | Charalambos Andreadis        |
| UCSF Medical Center-Mount Zion                           | Mack Roach                   |
| UF Cancer Center at Orlando Health                       | Eleftherios (Terry) Mamounas |
| UNC Lineberger Comprehensive Cancer Center               | Thomas E. Seay               |
| UNC Lineberger Comprehensive Cancer Center               | Thomas Shea                  |
| University of Alabama at Birmingham Cancer Center        | Carla Falkson                |
| University of Arizona Medical Center-University Campus   | Thomas P. Miller             |
| University of Arkansas for Medical Sciences              | Laura Hutchins               |
| University of California Davis Comp Cancer Center        | David R. Gandara             |
| University of Chicago Comprehensive Cancer Center        | Mitchell Posner              |
| University of Cincinnati                                 | Eric Eisenhauer              |
| University of Cincinnati                                 | Leslie Oleksowicz            |
| University of Cincinnati                                 | Rami S. Komrokji             |



|                                                       |                       |
|-------------------------------------------------------|-----------------------|
| University of Cincinnati                              | Zeina A. Nahleh       |
| University of Colorado Cancer Center                  | Rachel Rabinovitch    |
| University of Colorado Cancer Center                  | Anthony D. Elias      |
| University of Connecticut                             | Eric Eisenhauer       |
| University of Hawaii Cancer Center                    | Jeffrey Berenberg     |
| University of Illinois at Chicago                     | David Peace           |
| University of Illinois at Chicago                     | John Quigley          |
| University of Illinois at Chicago                     | Lawrence Feldman      |
| University of Iowa/Holden Comprehensive Cancer Center | David Bender          |
| University of Iowa/Holden Comprehensive Cancer Center | Laith Abushahin       |
| University of Kansas Medical Center                   | Karen Kelly           |
| University of Kentucky/Markey Cancer Center           | David Bender          |
| University of Maryland/Greenebaum Cancer Center       | Heather Manuel        |
| University of Maryland/Greenebaum Cancer Center       | Mark Mishra           |
| University of Massachusetts Medical School            | William Walsh         |
| University of Miami                                   | Caio Max Rocha Lima   |
| University of Michigan Comprehensive Cancer Center    | Laurence H. Baker,    |
| University of Minnesota/Masonic Cancer Center         | Bruce Peterson        |
| University of Mississippi Medical Center              | R. Darryl Hamilton    |
| University of Missouri - Ellis Fischel                | Puja Nistala          |
| University of Nebraska Medical Center                 | Julie Vose            |
| University of New Mexico                              | Fa-Chyi Lee           |
| University of North Carolina at Chapel Hill           | Simon Khagi           |
| University of Oklahoma Health Sciences Center         | Adam Asch             |
| University of Pennsylvania/Abramson Cancer Center     | Daniel Haller         |
| University of Pennsylvania/Abramson Cancer Center     | Robert Burger         |
| University of Pittsburgh Cancer Institute             | Warren Robinson       |
| University of Pittsburgh Cancer Institute             | John Kirkwood         |
| University of Rochester                               | Jonathan W. Friedberg |
| University of Rochester                               | Yuhchyan Chen         |
| University of South Alabama                           | Thaddeus A. Beeker    |
| University of Southern California                     | Heinz-Josef Lenz      |
| University of Tennessee Health Science Center         | Ari M. VanderWalde    |
| University of Texas Medical Branch                    | Ian M. Thompson       |
| University of Vermont College of Medicine             | Christopher Anker     |
| University of Wisconsin Hospital and Clinics          | Brad Kahl             |
| University of Wisconsin Hospital and Clinics          | James Stewart         |
| Vanderbilt University/Ingram Cancer Center            | David Johnson         |
| Vanderbilt University/Ingram Cancer Center            | Jordan Berlin         |
| Virginia Oncology Associates-Hampton                  | John Paschold         |
| Wake Forest University Health Sciences                | William Petty         |
| Walter Reed National Military Medical Center          | Michelle Ojemuyiwa    |
| Washington University - Siteman Cancer Center         | Nancy Bartlett        |
| Washington University School of Medicine              | David Mutch           |
| Wayne State University/Karmanos Cancer Institute      | Lawrence Flaherty     |
| Wayne State University/Karmanos Cancer Institute      | Michael Dominello     |

Weill Medical College of Cornell University  
WellSpan Health-York Hospital  
West Michigan Cancer Center  
West Virginia University Healthcare  
Wilford Hall Medical Center  
William Beaumont Hospital  
Windsor Regional Cancer Centre  
Yale University

Manish Shah  
Amit Shah  
Raymond Lord  
Mohamad Salkeni  
Bradley A. McGregor  
Douglas A. Nelson  
John S. Renshaw  
Michell A. Garrison  
Thomas J. Richard  
John M. Robertson  
Caroline Hamm  
Roy Decker

## **2. Eligibility criteria for pre-registration**

Patients were required to have operable histologically confirmed adenocarcinoma of the female breast, completed primary surgical treatment, and meet the following criteria in order to preregister: (1) ER and/or PR-positive invasive breast cancer (as defined and determined by local or reference pathology laboratory), and Her2/neu negative by either fluorescent in-situ hybridization (FISH) or immunohistochemistry (as determined by local or reference pathology laboratory) (2) negative axillary nodes, as assessed by a sentinel lymph node biopsy, an axillary dissection, or both, (3) tumor size 1.1–5.0cm (or 5 mm-1.0 cm plus unfavorable histological features, defined as an intermediate or poor nuclear and/or histologic grade, or lymphovascular invasion), (4) within 84 days from the final surgical procedure required to adequately treat the primary tumor, including either a mastectomy or local excision plus an acceptable axillary procedure, and adequate (at least 1 mm if margin width specified) tumor-free margins of resection (for invasive and ductal carcinoma in-situ), (5) age  $\geq$  18 years and  $\leq$  75 years, (6) adequate organ function, including the following within 4 weeks prior to pre-registration - leukocyte count  $\geq$  3500/mm<sup>3</sup> and platelets  $\geq$  100,000/mm<sup>3</sup>, serum creatinine  $\leq$  1.5mg/dL, serum aspartate transaminase (AST)  $\leq$  3-fold the upper institutional limits of normal, (7) disease-free of prior invasive malignancies for  $\geq$  5 years with the exception of curatively-treated basal cell or squamous cell carcinoma of the skin or carcinoma in situ of the cervix, (8) signed informed consent.

Patients with a previous ipsilateral or contralateral invasive breast cancer or ductal carcinoma in situ, or with bilateral synchronous cancers, were not eligible. Patients who developed breast cancer after 8 or more weeks of receiving a selective estrogen-receptor modulator (SERM; e.g., tamoxifen, toremifene, raloxifene) or an aromatase inhibitor (e.g., anastrozole, letrozole, exemestane) for breast cancer prevention or a SERM for other indications (e.g., raloxifene for osteoporosis) were not eligible. Additional information regarding exclusion criteria are in the protocol document.

## **3. Preregistration and registration**

A primary tumor sample was ordered within 3 days of preregistration by the enrolling site and sent to the Genomic Health laboratory (Redwood City, CA). Upon receipt of the Oncotype DX assay results, the enrolling site then proceeded with registration by taking the following steps: (1) faxed the Oncotype DX report to the ECOG Coordinating Center (with redaction of protected health information, and labelling with ECOG ID number obtained at preregistration), and (2) provided information for stratification variables (see section 4) required for randomization if indicated. Upon registration, chemotherapy treatment was either assigned or randomized based on the recurrence score results and randomization procedures described in section 4, if applicable.

## **4. Chemotherapy and endocrine therapy**

Guidelines for chemotherapy and endocrine therapy treatment were provided in the protocol, as summarized below.

## Chemotherapy regimens:

| Regimen Name                      | Regimen Dose/Schedule                                                                                                                                   | Regimen Schedule         | No. of Cycles            |
|-----------------------------------|---------------------------------------------------------------------------------------------------------------------------------------------------------|--------------------------|--------------------------|
| Oral CMF                          | C 100 mg/m <sup>2</sup> /day PO x 14 days<br>M 40 mg/m <sup>2</sup> IV days 1, 8<br>F 600 mg/m <sup>2</sup> IV days 1, 8                                | Every 4 weeks            | 6                        |
| IV CMF                            | C 600 mg/m <sup>2</sup> IV<br>M 40 mg/m <sup>2</sup> IV<br>F 600 mg/m <sup>2</sup> IV                                                                   | Every 3 weeks            | 6-8                      |
| Standard AC                       | A 60 mg/m <sup>2</sup> IV<br>C 600 mg/m <sup>2</sup> IV                                                                                                 | Every 3 weeks            | 4                        |
| Dose dense AC                     | A 60 mg/m <sup>2</sup> IV<br>C 600 mg/m <sup>2</sup> IV<br>Plus G-CSF                                                                                   | Every 2 weeks            | 4                        |
| Standard AC - T                   | A 60 mg/m <sup>2</sup> and C 600 mg/m <sup>2</sup> IV<br>every 3 weeks x 4 cycles ⇒ T 175 mg/m <sup>2</sup> every 3 weeks x 4 cycles                    | Every 3 weeks            | 8                        |
| Dose dense AC - T                 | A 60 mg/m <sup>2</sup> and C 600 mg/m <sup>2</sup> IV plus G-CSF every 2 weeks x 4 cycles ⇒ T 175 mg/m <sup>2</sup> plus G-CSF every 2 weeks x 4 cycles | Every 2 weeks            | 8                        |
| FEC                               | F – 500 mg/m <sup>2</sup> IV<br>E – 50-100 mg/m <sup>2</sup> IV<br>C – 500 mg/m <sup>2</sup> IV                                                         | Every 3 weeks            | 6                        |
| TAC                               | T - 75 mg/m <sup>2</sup><br>A - 50 mg/m <sup>2</sup><br>C - 500 mg/m <sup>2</sup><br><b>NOTE:</b> TAC should be used only in women <= 70 years of age   | Every 3 weeks            | 4-6                      |
| TC                                | T - 75 mg/m <sup>2</sup><br>C - 600 mg/m <sup>2</sup>                                                                                                   | Every 3 weeks            | 4                        |
| Other protocol-specified regimens | Participating in other CTSU trials including chemotherapy                                                                                               | As specified in protocol | As specified in protocol |

## Endocrine Therapy – Years 1-5:

| Menopausal Status  | Regimen                                                                                                                                                             |
|--------------------|---------------------------------------------------------------------------------------------------------------------------------------------------------------------|
| Pre, Peri, or Post | Tamoxifen 20 mg PO daily                                                                                                                                            |
| Post               | Anastrozole (Arimidex) 1 mg PO daily                                                                                                                                |
| Post               | Letrozole (Femara) 2.5 mg PO daily                                                                                                                                  |
| Post               | Exemestane (Aromasin) 25 mg PO daily                                                                                                                                |
| Pre or Peri        | Participating in another CTSU study; as specified in treatment protocol                                                                                             |
| Post               | Participating in another CTSU study; as specified in treatment protocol                                                                                             |
| Pre or Peri        | Ovarian suppression (surgery, irradiation, or Gn RH analogue) may be used in conjunction with tamoxifen or an aromatase inhibitor, and may continue beyond 5 years. |

## Endocrine Therapy -Years 5-10

| Menopausal Status at year 6 | Treatment during years 1-5 | Treatment years 6-10                                  |
|-----------------------------|----------------------------|-------------------------------------------------------|
| Pre or Peri                 | Tamoxifen 20 mg PO daily   | No further treatment                                  |
| Post                        | Tamoxifen 20 mg/ PO daily  | Any aromatase inhibitor                               |
| Post                        | Any aromatase inhibitor    | No further treatment                                  |
| Post                        | Any aromatase inhibitor    | May continue aromatase inhibitor                      |
| Pre or Peri                 | Any treatment              | Participating in CTSU study; as specified in protocol |
| Post                        | Any treatment              | Participating in CTSU study; as specified in protocol |

## 5. Low-risk (RS 0-10) & high-risk (RS 26 or higher) registries and RS distribution

Subjects with a recurrence score that was either low (RS 0-10 – arm A) or high (RS 26 or higher – arm D) were enrolled on prospective registry. Federal funding was provided for sites for the randomized arms (arms B and C) with a recurrence score of 11-25 and the low-risk registry (arm A). Enrollment to the high-risk registry (arm D) and subsequent followup was voluntary by the participating sites. This contributed to higher rates of no baseline/followup information and exclusion of registered subjects from the main analysis in arm D (341/1737 [19.6%]) than arm A (7 of 1629 [0.4%]), arm B (55 of 3458 [1.6%]), and arm C (131 of 3449 [3.8%]). This contributed to differences in recurrence score distribution of low (0-10), mid-range (11-25) and high (26 or higher) in the 10,273 registered subjects (15.9%, 67.2%, and 16.9%, respectively) compared with the 9719 subjects included in the main analysis (16.7%, 69.1%, and 14.3%, respectively).

## 6. Statistical methods

**6A. Randomization procedures.** Randomization was conducted centrally using permuted blocks within strata, with the strata defined by tumor size (2 cm or less vs. more than 2 cm), menopausal status (pre vs. post), planned chemotherapy (taxane-containing or not), planned radiation therapy (whole breast, no boost planned vs. whole breast, boost planned vs. partial breast irradiation planned vs. no planned radiation therapy for patients who had a mastectomy), and recurrence score group (11 to 15 vs. 16 to 20 vs. 21 to 25, which was added midway through the study).

**6B. Study endpoints and statistical methods used for comparisons.** The primary trial endpoint was invasive disease-free survival (iDFS), defined to be time from registration to first event, where the first event is any of ipsilateral breast tumor recurrence, local recurrence, regional recurrence, distant recurrence, contralateral second primary invasive cancer, second primary non-breast invasive cancer (excluding non-melanoma skin cancers), or death without evidence of recurrence. Secondary endpoints included: distant recurrence free interval (DRFI), defined as time from registration to date of distant recurrence of breast cancer, or of death with distant recurrence, if death is the first manifestation of distant recurrence; relapse free interval (RFI), defined as date from registration to first recurrence of breast cancer (ipsilateral breast, local-regional, or distant), or to the date of death with recurrence, if death is the first manifestation of recurrence; and overall survival (OS), defined as date from registration to death of any cause.

The primary comparisons of invasive disease-free survival and other pre-specified endpoints were stratified logrank tests using the randomization stratification variables. Hazard ratios were estimated from proportional hazards models, also stratified as in the randomization. Event-free rates were estimated using the Kaplan-Meier method, with confidence intervals computed using the log-log transform and Greenwood's variance. Non-inferiority tests were planned for DRFI and OS (but not RFI). The non-inferiority margins specified correspond to hazard ratios of 1.61 for DRFI and 1.46 for OS. The justification for these was based on absolute differences in 5-year rates. While both of these endpoints are short of the information needed for full power for these comparisons, the confidence intervals exclude these values and thus support conclusions of non-inferiority for these endpoints. The protocol also specified that a secondary analysis by treatment received would be performed (the as treated analysis), but did not specify the threshold for significance for this analysis (the appropriate threshold would be different, since the power of this comparison is not affected by nonadherence). As is often recommended for noninferiority comparisons, the comparison may be interpreted based on whether the confidence interval on the hazard ratio contains the noninferiority margin (1.322) or no difference (1.0). These comparisons are also stratified as in the randomization, but could still be biased because of differences in the group refusing chemo on arm C and the group receiving chemo on arm B.

**6C. Adjustment in sample size for non-adherence.** Based on data available as of October 30, 2008 (18 months after study activation), there were higher than anticipated rates of non-adherence to randomized treatment in both arms of the recurrence score 11 to 25 group (12% on average), including the chemoendocrine therapy arm (17% received no chemotherapy) and endocrine therapy alone arm (7% received chemotherapy). This required a 73% increase in the number of patients randomized relative to a design with 100% adherence (based on the Lachin-Foulkes correction), to ensure adequate power. Based on assuming accrual of 6,860 patients accrued over 3.81 years, of whom up to 5% would be ineligible, it was projected that 6517 eligible patients would be required.

**6D. Interim monitoring.** The first interim analysis was performed when at least 25% of the total planned number of invasive disease-free survival events were reported (N=209), and subsequent interim analyses were performed annually until either the criteria for early stopping were met or the total planned number of events for full information on invasive disease-free survival events (N=835) was achieved. At each interim analysis (and at the final analysis), the stratified log rank test statistic was computed. The stopping boundary for rejecting non-inferiority was based on a truncated version of the Lan-Demets error spending rate function corresponding to an O'Brien-Fleming shaped boundary with an overall one-sided type I error of 10%. At early analyses, the boundary was truncated at a level corresponding to a one-sided nominal significance of 0.002, and the boundary function was computed to maintain the type I error rate adjusting for the effects of the truncation and the effects of the early stopping in favor of non-inferiority. To allow for early stopping in favor of non-inferiority, the study was also monitored using conditional power for the primary assigned treatment comparison above and using repeated confidence interval (RCI) methodology. At each interim analysis, the conditional power of the log rank test for the primary comparison at a type I error rate of 10% (one-sided) was computed using simulations (incorporating the estimated distribution of treatment non-adherence). The two-sided 95% RCI on the log hazard ratio (for received endocrine vs. chemoendocrine therapy), was also computed. Since intention to treat and as treated analyses have well-known potential biases in the presence of treatment non-adherence, the hazard ratio in the subpopulation that would receive the assigned treatment if assigned to either arm was estimated using a full mixture likelihood approach and the RCI obtained by inverting the corresponding likelihood ratio test. The RCI used the critical value from the O'Brien-Fleming error spending rate function with an overall one-sided 2.5% error rate. If the conditional power of the assigned treatment analysis is less than 10% and the upper limit of the RCI lies below the minimum unacceptable log ratio of log (1.322), then the study will be stopped in favor of non-inferiority. This monitoring rule was deliberately chosen to be conservative, since the results must be convincing that the conclusion of non-inferiority is based on an adequate amount of information rather than on an underpowered comparison. Six interim analyses were conducted. The boundary for rejecting non-inferiority at the final analysis to control the overall significant level at 10% corresponds to a nominal one-sided significance level of 0.074. Median follow-up for invasive disease-free survival in the recurrence score 11 to 25 cohort was 91 months in arm B and 90 months in arm C, and for overall survival was 96 months in both arms.

**6E. Impact of Incomplete followup information.** Cumulative incidence analysis was used to examine the association of lost to follow-up with baseline factors. The patients who had no follow-up, who had some follow-up and subsequently withdrew consent for further follow-up, or for whom the institutions could not obtain further follow-up, were counted as lost to follow-up events, and DFS events were regarded as competing events. Overall, the 9-year cumulative incidence of lost to follow events was 12.2% on arm B and 14.7% on arm C (the arms here are the assigned groups). In arm C, there was a significant association of lost to follow-up with RS, with 9-year cumulative drop out of 16.6% for RS 11-15, 14.3% for RS 16-20, and 12.5% for RS 21-25, but there was no association with RS in arm B. This may be due to a similar association

with the decision to refuse assignment to chemo in arm C (which was higher for low RS patients), and patients refusing chemo being more likely to drop out from follow-up, too. The logrank tests and Cox models for treatment comparisons were stratified on the randomization factors, including grouped RS, tumor size, and menopause, and the validity of the analyses requires only that censoring be noninformative within strata, so the association with RS should not affect these. There was also an association with age/menopause in both arms, with the postmenopausal patients who were age  $\leq 50$  having higher withdrawal rates (22.5% on arm C, 18.3% on arm B) than other groups. This is a small group, though.

Stratification does not protect against bias from differences in unobserved or unknown factors. For the primary comparison, the one-sided p-value is 0.13, vs. a threshold for rejecting noninferiority of 0.074. To explore whether differences in cases lost to follow-up on the two arms could affect the results, outcomes for cases with incomplete follow-up were simulated under some different scenarios. The average hazard rates were estimated within a reduced set of 12 strata defined by combinations of grouped RS, tumor size, and menopause (pooling data from arms B and C). These were then multiplied and divided by appropriate factors in arms B and C to give a specified treatment hazard ratio within each of the strata. These (constant) hazard rates were then used to generate additional follow-up for cases with incomplete follow-up (including those with no follow-up reported). For cases with DFS events in the original data, the observed data were used, and for cases with censored DFS times, a random DFS event time was generated given the observed follow-up and the stratum and arm. The calendar time of the 835<sup>th</sup> event was then determined (using the actual entry times), and follow-up on all cases was truncated at that time, giving a data set with 835 DFS events. The stratified logrank test was then calculated, and the 9-year Kaplan-Meier estimates obtained for both arms. This process was repeated 500 times in each scenario. In all scenarios, on average about 120 DFS events were from the generated additional follow-up and 715 from the original data (reflecting that there was substantial incomplete follow-up). The calculations were done with treatment hazard ratios (B vs. C) of 1.08 (which is the estimate from the observed data), 1.15, 1.20 and 1.30. The following table gives the average (over the 500 replicates) primary (one-sided) p-value, the proportion of samples where the p-value was  $< 0.074$ , the average difference in the 9-year DFS rates between the randomized arms, and the proportion of samples where the difference was  $\geq 3\%$ .

| Ratio | Average p-value | Proportion $p < 0.074$ | Average Difference in DFS rates (C – B) | Proportion Difference $\geq 3\%$ |
|-------|-----------------|------------------------|-----------------------------------------|----------------------------------|
| 1.08  | 0.121           | 0.27                   | 1.3%                                    | 0                                |
| 1.15  | 0.102           | 0.41                   | 1.4%                                    | 0                                |
| 1.20  | 0.084           | 0.55                   | 1.6%                                    | 0.004                            |
| 1.30  | 0.064           | 0.68                   | 1.7%                                    | 0.012                            |

The results show that with a hazard ratio of 1.2 or greater for the additional data, the study likely would have rejected noninferiority for the primary comparison, but in all scenarios the overall difference is unlikely to be clinically meaningful. (This is due to the better than expected DFS rate, so the targeted hazard ratio corresponds to an absolute difference that is smaller than thought to be meaningful.)

**6F. Exploratory subset analysis.** No subgroup interaction analyses were planned a-priori with the exception of the continuous RS by treatment analysis shown in Figures S5-10. Having concluded from the primary comparison that chemotherapy does not have a meaningful

benefit overall in the RS 11-25 population, the purpose of the subset analyses is to check for consistency in effects over the subsets and to consider whether the data suggest that some subgroups might still be benefitting from chemotherapy. Because of the smaller numbers, it is very difficult to establish non-inferiority in individual subgroups, and they generally do not provide adequate power for establishing superiority of chemotherapy, so these analyses should be primarily viewed as descriptive and exploratory. The effect of multiple testing also needs to be considered. For (re)establishing superiority of chemotherapy in subsets, invasive DFS is well established as a clinically meaningful endpoint for adjuvant therapies in breast cancer, and would be the appropriate endpoint to use here. The type I error for subset superiority comparisons would need to be controlled at an overall two-sided 5% level. With DFS comparisons in 32 subsets, a Bonferroni correction requires a p-value of 0.0016 for superiority in subsets. The most significant of the DFS subset comparisons had  $p=0.0018$  in the age  $\leq 50$  subset, which is very close but not quite significant. This specific observation is of particular relevance, since the Early Breast Cancer Trialists' metaanalysis demonstrated that younger women derive greater benefit from adjuvant chemotherapy, which may be in part due to early menopause associated with cytotoxic therapy in older premenopausal women. While this difference is thus not conclusive, this and some of the other subsets do still suggest the possibility of benefit and we believe it is important to describe these findings. There was also an a-priori expectation that the benefit of chemotherapy, if any, would vary with RS, so giving these estimates is also important information, even if the evidence for benefit in some subsets is not conclusive



## 7. Supplemental tables 1-6

**Table S1.** Characteristics of patients by assigned treatment in intention-to-treat population

|                                | <b>Recurrence Score<br/>0-10</b> | <b>Recurrence Score 11 to 25</b> |                        | <b>Recurrence Score 26<br/>or Higher</b> |
|--------------------------------|----------------------------------|----------------------------------|------------------------|------------------------------------------|
| Study Arm                      | Arm A                            | Arm B                            | Arm C                  | Arm D                                    |
| Assigned Treatment             | Endocrine Therapy                | Endocrine Therapy                | Chemoendocrine Therapy | Chemoendocrine Therapy                   |
| Number                         | 1619                             | 3399                             | 3312                   | 1389                                     |
| <b>Age (years)</b>             |                                  |                                  |                        |                                          |
| Median (range)                 | 58 (25-75)                       | 55 (23-75)                       | 55 (25-75)             | 56 (23-75)                               |
| <= 40                          | 58 (4%)                          | 154 (5%)                         | 157 (5%)               | 79 (6%)                                  |
| 41-50                          | 371 (23%)                        | 985 (29%)                        | 920 (28%)              | 330 (24%)                                |
| 51- 60                         | 563 (35%)                        | 1235 (36%)                       | 1206 (36%)             | 512 (37%)                                |
| 61-70                          | 518 (32%)                        | 868 (26%)                        | 895 (27)               | 395 (28%)                                |
| 71-75                          | 109 (7%)                         | 157 (5%)                         | 134 (4%)               | 73 (5%)                                  |
| <b>Menopausal Status</b>       |                                  |                                  |                        |                                          |
| Pre                            | 478 (30%)                        | 1212 (36%)                       | 1203 (36%)             | 407 (29%)                                |
| Post                           | 1141 (70%)                       | 2187 (64%)                       | 2109 (64%)             | 982 (71%)                                |
| <b>Tumor size (cm)</b>         |                                  |                                  |                        |                                          |
| Median (interquartile          | 1.5 (1.2, 2.0)                   | 1.5 (1.2, 2.0)                   | 1.5 (1.2, 2.0)         | 1.7 (1.3, 2.3)                           |
| Mean – cm (+/- SD)             | 1.74 (+/-0.76)                   | 1.71 (+/-0.81)                   | 1.71 (+/-0.77)         | 1.88 (+/-0.99)                           |
| <b>Distribution –no./total</b> |                                  |                                  |                        |                                          |
| <= 1.0                         | 202 (12%)                        | 446 (13%)                        | 423 (13%)              | 188 (14%)                                |
| 1.1 - 2.0                      | 1018 (63%)                       | 2150 (63%)                       | 2103 (64%)             | 741 (53%)                                |
| 2.1 – 3.0                      | 297 (18%)                        | 640 (19%)                        | 625 (19%)              | 348 (25%)                                |
| 3.1 – 4.0                      | 83 (5%)                          | 122 (4%)                         | 119 (4%)               | 91 (7%)                                  |
| >= 4.1                         | 19 (1%)                          | 41 (1%)                          | 40 (1%)                | 20 (1%)                                  |
| Unknown                        | 0                                | 0                                | 2                      | 1                                        |
| <b>Histologic grade</b>        |                                  |                                  |                        |                                          |
| Low                            | 530 (34%)                        | 959 (29%)                        | 934 (29%)              | 89 (7%)                                  |
| Intermediate                   | 931 (59%)                        | 1884 (57%)                       | 1837 (57%)             | 590 (43%)                                |
| High                           | 111 (7%)                         | 439 (13%)                        | 445 (14%)              | 681 (50%)                                |
| Unknown                        | 47                               | 117                              | 96                     | 29                                       |
| <b>ER expression</b>           |                                  |                                  |                        |                                          |
| Negative                       | 5 (0%)                           | 6 (0%)                           | 3 (0%)                 | 40 (3%)                                  |
| Positive                       | 1614 (100%)                      | 3393 (100%)                      | 3309 (100%)            | 1349 (97%)                               |
| <b>PgR expression</b>          |                                  |                                  |                        |                                          |
| Negative                       | 28 (2%)                          | 267 (8%)                         | 251 (8%)               | 405 (30%)                                |
| Positive                       | 1555 (98%)                       | 3072 (92%)                       | 2989 (92%)             | 948 (70%)                                |
| Unknown                        | 36                               | 60                               | 72                     | 36                                       |
| <b>Clinical Risk</b>           |                                  |                                  |                        |                                          |
| Low                            | 1227 (78%)                       | 2440 (74%)                       | 2359 (73%)             | 589 (43%)                                |
| High                           | 345 (22%)                        | 842 (26%)                        | 855 (27%)              | 770 (57%)                                |
| Unknown                        | 47                               | 117                              | 98                     | 30                                       |

|                         |              |              |              |              |
|-------------------------|--------------|--------------|--------------|--------------|
| <b>Primary Surgery</b>  |              |              |              |              |
| Mastectomy              | 516 (32%)    | 935 (28%)    | 917 (28%)    | 368 (26%)    |
| Breast                  | 1103 (68%)   | 2464 (72%)   | 2395 (72%)   | 1021 (74%)   |
| <b>Adjuvant Chemo</b>   |              |              |              |              |
| Yes                     | 8 (0.5%)     | 185 (5.4%)   | 2704 (81.6%) | 1300 (93.6%) |
| No                      | 1611 (99.5%) | 3214 (94.6%) | 608 (18.4%)  | 89 (6.4%)    |
| <b>Recurrence score</b> |              |              |              |              |
| 0-5                     | 432 (27%)    |              |              |              |
| 6-10                    | 1187 (73%)   |              |              |              |
| 11-15                   |              | 1214 (36%)   | 1159 (35%)   |              |
| 16-20                   |              | 1368 (40%)   | 1344 (41%)   |              |
| 21-25                   |              | 817 (24%)    | 809 (24%)    |              |
| 26-30                   |              |              |              | 598 (43%)    |
| 31-35                   |              |              |              | 315 (23%)    |
| 36-40                   |              |              |              | 158 (11%)    |
| 41-50                   |              |              |              | 202 (15%)    |
| 51-100                  |              |              |              | 116 (8%)     |

Clinical risk group as defined in the MINDACT trial (Low risk defined by low grade and tumor size  $\leq 3$ cm, intermediate grade and tumor size  $\leq 2$ cm, and high grade and tumor size  $\leq 1$ cm; high risk defined as all other cases with known values for grade and tumor size).

**Table S2. Treatment administered**

|                                           | Recurrence Score<br>0-10   | Recurrence Score 11-25     |                         | Recurrence Score<br>26 or Higher |
|-------------------------------------------|----------------------------|----------------------------|-------------------------|----------------------------------|
|                                           | Arm A<br>Endocrine Therapy | Arm B<br>Endocrine Therapy | Arm C<br>Chemoendocrine | Arm D<br>Chemoendocrine          |
| Total Number                              | 1619                       | 3319                       | 3312                    | 1389                             |
| <b>Adjuvant Chemotherapy</b>              | (n=8)                      | (n=185)                    | (n=2704)                | (n=1300)                         |
| CMF                                       | 1 (12%)                    | 12 (6%)                    | 183 (7%)                | 52 (4%)                          |
| Anthracycline w/o Taxane                  | 0 (0%)                     | 52 (28%)                   | 774 (29%)               | 334 (26%)                        |
| Anthracycline and Taxane                  | 2 (25%)                    | 17 (9%)                    | 181 (7%)                | 244 (19%)                        |
| Taxane & Cyclophosphamide                 | 3 (38%)                    | 95 (51%)                   | 1515 (56%)              | 589 (45%)                        |
| Other or Type Not Specified               | 2 (25%)                    | 9 (5%)                     | 51 (2%)                 | 81 (6%)                          |
| None                                      | 1611                       | 3214                       | 608                     | 89                               |
| <b>Endocrine Therapy (Premenopausal)</b>  | (n=478)                    | (n=1212)                   | (n=1203)                | (n=407)                          |
| AI                                        | 32 (7%)                    | 53 (4%)                    | 110 (9%)                | 41 (10%)                         |
| OFS                                       | 17 (4%)                    | 62 (5%)                    | 33 (3%)                 | 21 (5%)                          |
| OFS and AI                                | 32 (7%)                    | 124 (10%)                  | 94 (8%)                 | 31 (8%)                          |
| Tam                                       | 238 (50%)                  | 558 (46%)                  | 461 (38%)               | 177 (43%)                        |
| Tam and AI                                | 146 (31%)                  | 394 (33%)                  | 482 (40%)               | 117 (29%)                        |
| Other                                     | 1 (0%)                     | 5 (0%)                     | 2 (0%)                  | 1 (0%)                           |
| None Reported                             | 12 (3%)                    | 16 (1%)                    | 21 (2%)                 | 19 (5%)                          |
| <b>Endocrine Therapy (Postmenopausal)</b> | (n=1141)                   | (n=2187)                   | (n=2109)                | (n=982)                          |
| AI                                        | 843 (74%)                  | 1568 (72%)                 | 1441 (68%)              | 695 (71%)                        |
| Tam                                       | 99 (9%)                    | 170 (8%)                   | 139 (7%)                | 79 (8%)                          |
| Tam and AI                                | 180 (16%)                  | 438 (20%)                  | 483 (23%)               | 176 (18%)                        |
| Other                                     | 0 (0%)                     | 0 (0%)                     | 1 (0%)                  | 1 (0%)                           |
| None Reported                             | 19 (2%)                    | 11 (1%)                    | 45 (2%)                 | 31 (3%)                          |

Abbreviations: AI – aromatase inhibitor; OFS – ovarian function suppression; Tam – tamoxifen. Endocrine therapy categories are based on whether any therapy of that type was given, with the exception of OFS. Endocrine therapy is classified as OFS for premenopausal patients if it is initiated within 2 years of entry and prior to any DFS events.

**Table S3.** Characteristics of patients with RS 11-25 according to treatment given

|                          | <b>Chemoendocrine (n=2889)</b> | <b>Endocrine (n=3822)</b> |
|--------------------------|--------------------------------|---------------------------|
| <b>Age (years)</b>       |                                |                           |
| <=40                     | 152 (5%)                       | 159 (4%)                  |
| 41 to 50                 | 859 (30%)                      | 1046 (27%)                |
| 51 to 60                 | 1060 (37%)                     | 1381 (36%)                |
| 61 to 70                 | 717 (25%)                      | 1046 (27%)                |
| 71 to 75                 | 101 (3%)                       | 190 (5%)                  |
| <b>Menopausal Status</b> |                                |                           |
| Pre                      | 1112 (38%)                     | 1303 (34%)                |
| Post                     | 1777 (62%)                     | 2519 (66%)                |
| <b>Tumor Size (cm)</b>   |                                |                           |
| <=1.0                    | 344 (12%)                      | 525 (14%)                 |
| 1.1 to 2.0               | 1821 (63%)                     | 2432 (64%)                |
| 2.1 to 3.0               | 583 (20%)                      | 682 (18%)                 |
| 3.1 to 4.0               | 107 (4%)                       | 134 (4%)                  |
| >4.0                     | 33 (1%)                        | 48 (1%)                   |
| Unknown                  | 1                              | 1                         |
| <b>Histologic Grade</b>  |                                |                           |
| Low                      | 767 (27%)                      | 1126 (30%)                |
| Intermediate             | 1608 (57%)                     | 2113 (57%)                |
| High                     | 425 (15%)                      | 459 (12%)                 |
| Unknown                  | 89                             | 124                       |
| <b>ER Expression</b>     |                                |                           |
| Negative                 | 3 (0%)                         | 6 (0%)                    |
| Positive                 | 2886 (100%)                    | 3816 (100%)               |
| <b>PgR Expression</b>    |                                |                           |
| Negative                 | 226 (8%)                       | 292 (8%)                  |
| Positive                 | 2600 (92%)                     | 3461 (92%)                |
| Unknown                  | 63                             | 69                        |
| <b>Clinical Risk+</b>    |                                |                           |
| High                     | 806 (29%)                      | 891 (24%)                 |
| Low                      | 1993 (71%)                     | 2806 (76%)                |
| Unknown                  | 90                             | 125                       |
| <b>Surgery</b>           |                                |                           |
| Mastectomy               | 807 (28%)                      | 1045 (27%)                |
| Tumorectomy              | 2082 (72%)                     | 2777 (73%)                |
| <b>Recurrence Score</b>  |                                |                           |
| 11-15                    | 916 (32%)                      | 1457 (38%)                |
| 16-20                    | 1178 (41%)                     | 1534 (40%)                |
| 21-25                    | 795 (28%)                      | 831 (22%)                 |

Statistically significant differences: age ( $p=0.0005$ ), menopausal status ( $p=0.0002$ ), tumor size ( $p=0.05$ ), histologic grade ( $p=0.0009$ ), clinical risk ( $p<0.0001$ ) and recurrence score ( $p<0.0001$ ). +Clinical risk group as defined in the MINDACT trial (Low risk defined by low grade and tumor size  $\leq 3$ cm, intermediate grade and tumor size  $\leq 2$ cm, and high grade and tumor size  $\leq 1$ cm; high risk defined as all other cases with known values for grade and tumor size).

**Table S4.** Type of first invasive disease-free survival event by RS and assigned treatment

|                                                                                         | Recurrence Score<br>0-10            | Recurrence Score 11-25              |                                    | Recurrence Score 26<br>or Higher   |
|-----------------------------------------------------------------------------------------|-------------------------------------|-------------------------------------|------------------------------------|------------------------------------|
|                                                                                         | Arm A<br>Endocrine Therapy<br>Alone | Arm B<br>Endocrine<br>Therapy Alone | Arm C<br>Chemoendocrine<br>Therapy | Arm D<br>Chemoendocrine<br>Therapy |
| No. of patients                                                                         | 1619                                | 3399                                | 3312                               | 1389                               |
| Ipsilateral breast<br>tumor recurrence                                                  | 10                                  | 38                                  | 31                                 | 11                                 |
| Other local-regional<br>recurrence (+/-<br>ipsilateral breast<br>recurrence)            | 10                                  | 39                                  | 31                                 | 27                                 |
| Distant recurrence<br>(+/- ipsilateral breast<br>or other local-regional<br>recurrence) | 28                                  | 107                                 | 92                                 | 80                                 |
| Opposite breast<br>cancer                                                               | 29                                  | 44                                  | 48                                 | 9                                  |
| Other second primary<br>cancer                                                          | 75                                  | 145                                 | 146                                | 47                                 |
| Death                                                                                   | 33                                  | 63                                  | 52                                 | 15                                 |
| Total no. of events<br>(crude %)                                                        | 185<br>(11.4%)                      | 436<br>(12.8%)                      | 400<br>(12.1%)                     | 189<br>(13.6%)                     |

**Table S5.** Type of first invasive disease-free survival event by treatment received for randomized cohort with RS 11-25

|                                                                                  | Received<br>Endocrine Therapy | Received<br>Chemoendocrine Therapy |
|----------------------------------------------------------------------------------|-------------------------------|------------------------------------|
| No. of patients                                                                  | 3822                          | 2889                               |
| Ipsilateral breast tumor recurrence                                              | 43                            | 26                                 |
| Other local-regional recurrence<br>(+/- ipsilateral breast recurrence)           | 45                            | 25                                 |
| Distant recurrence(+/- ipsilateral breast<br>or other local-regional recurrence) | 109                           | 90                                 |
| Opposite breast cancer                                                           | 53                            | 39                                 |
| Other second primary cancer                                                      | 168                           | 123                                |
| Death                                                                            | 72                            | 43                                 |
| Total no. of events                                                              | 490 (12.8%)                   | 346 (12.0%)                        |

**Table S6.** Type of first IDFS event for randomized patients by age, RS and arm

|                                                                                | RS 11-15 |     | RS 16-20 |     | RS 21-25 |     |
|--------------------------------------------------------------------------------|----------|-----|----------|-----|----------|-----|
|                                                                                | B        | C   | B        | C   | B        | C   |
| Age <=50 N                                                                     | 439      | 362 | 454      | 469 | 246      | 246 |
| Ipsilateral breast tumor recurrence                                            | 8        | 7   | 10       | 4   | 6        | 1   |
| Other local-regional recurrence (+/- ipsilateral breast recurrence)            | 3        | 3   | 8        | 8   | 8        | 5   |
| Distant recurrence (+/- ipsilateral breast or other local-regional recurrence) | 9        | 7   | 17       | 10  | 17       | 9   |
| Opposite breast cancer                                                         | 4        | 6   | 9        | 5   | 3        | 3   |
| Other second primary cancer                                                    | 16       | 8   | 16       | 9   | 5        | 6   |
| Death                                                                          | 5        | 4   | 5        | 2   | 2        | 2   |
| Total Events                                                                   | 45       | 35  | 65       | 38  | 41       | 26  |
|                                                                                |          |     |          |     |          |     |
| Age 51-65 N                                                                    | 602      | 648 | 732      | 693 | 437      | 433 |
| Ipsilateral breast tumor recurrence                                            | 1        | 4   | 5        | 6   | 5        | 4   |
| Other local-regional recurrence (+/- ipsilateral breast recurrence)            | 4        | 7   | 7        | 3   | 7        | 4   |
| Distant recurrence (+/- ipsilateral breast or other local-regional recurrence) | 15       | 8   | 16       | 20  | 16       | 20  |
| Opposite breast cancer                                                         | 4        | 5   | 8        | 17  | 8        | 9   |
| Other second primary cancer                                                    | 13       | 32  | 38       | 35  | 20       | 14  |
| Death                                                                          | 11       | 15  | 7        | 12  | 8        | 2   |
| Total Events                                                                   | 48       | 71  | 81       | 93  | 64       | 53  |
|                                                                                |          |     |          |     |          |     |
| Age 66-75 N                                                                    | 173      | 149 | 182      | 182 | 134      | 130 |
| Ipsilateral breast tumor recurrence                                            | 0        | 2   | 3        | 2   | 0        | 1   |
| Other local-regional recurrence (+/- ipsilateral breast recurrence)            | 1        | 0   | 1        | 1   | 0        | 0   |
| Distant recurrence (+/- ipsilateral breast or other local-regional recurrence) | 4        | 3   | 5        | 7   | 8        | 8   |
| Opposite breast cancer                                                         | 5        | 0   | 3        | 3   | 0        | 0   |
| Other second primary cancer                                                    | 18       | 15  | 12       | 14  | 7        | 13  |
| Death                                                                          | 7        | 4   | 9        | 8   | 9        | 3   |
| Total Events                                                                   | 35       | 24  | 33       | 35  | 24       | 25  |

## 8. Supplemental figures 1-13

### Figure Labelling:

- **Assigned treatment (intention-to-treat analysis):** labelled as “**Arm B**” (RS 11-25 and randomized to endocrine therapy alone), “**Arm C**” (RS 11-25 and randomized to chemoendocrine therapy), “**Arm A**” (RS 0-10 and assigned to endocrine therapy alone), or “**Arm D**” (RS 26 or higher and assigned to chemoendocrine therapy)”
- **Treatment received (as-treated analysis):** labelled as “**Received endocrine therapy**” or “**Received Endocrine + Chemo**”

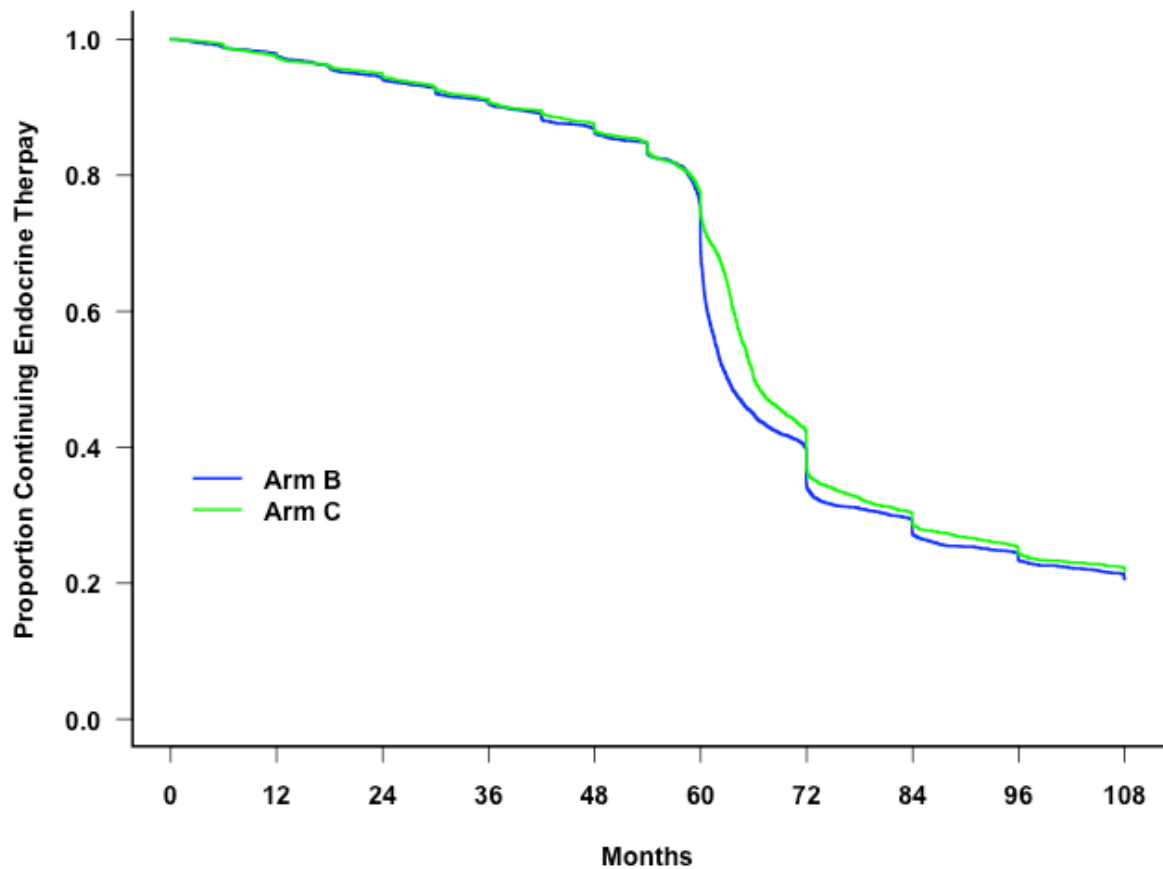

**Figure S1.** Duration of endocrine therapy by treatment arm in the RS 11 to 25 group in the intention-to-treat population (assigned treatment)



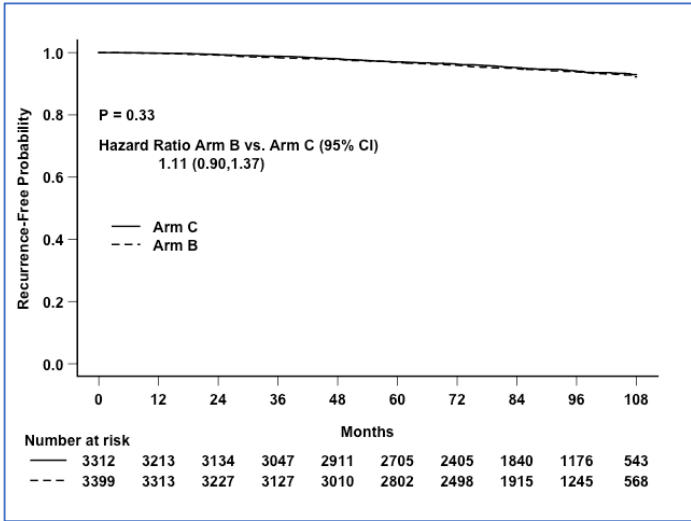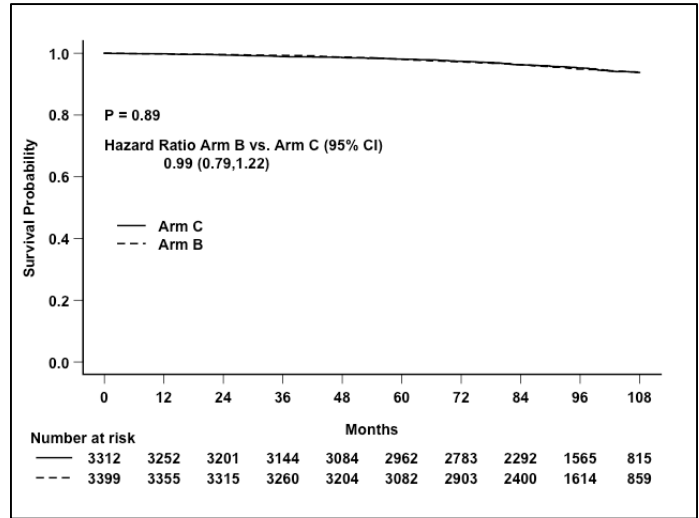

**Figure S2a-b.** Recurrence Score 11 to 25: Clinical Outcomes by Assigned Treatment Arm.

Kaplan Meier estimates by assigned treatment arm for endocrine therapy alone (arm B) chemoendocrine therapy (arm C) in the intention-to-treat analysis for freedom from breast cancer recurrence at a distant or local-regional site (a-left panel), and overall survival (b-right panel).

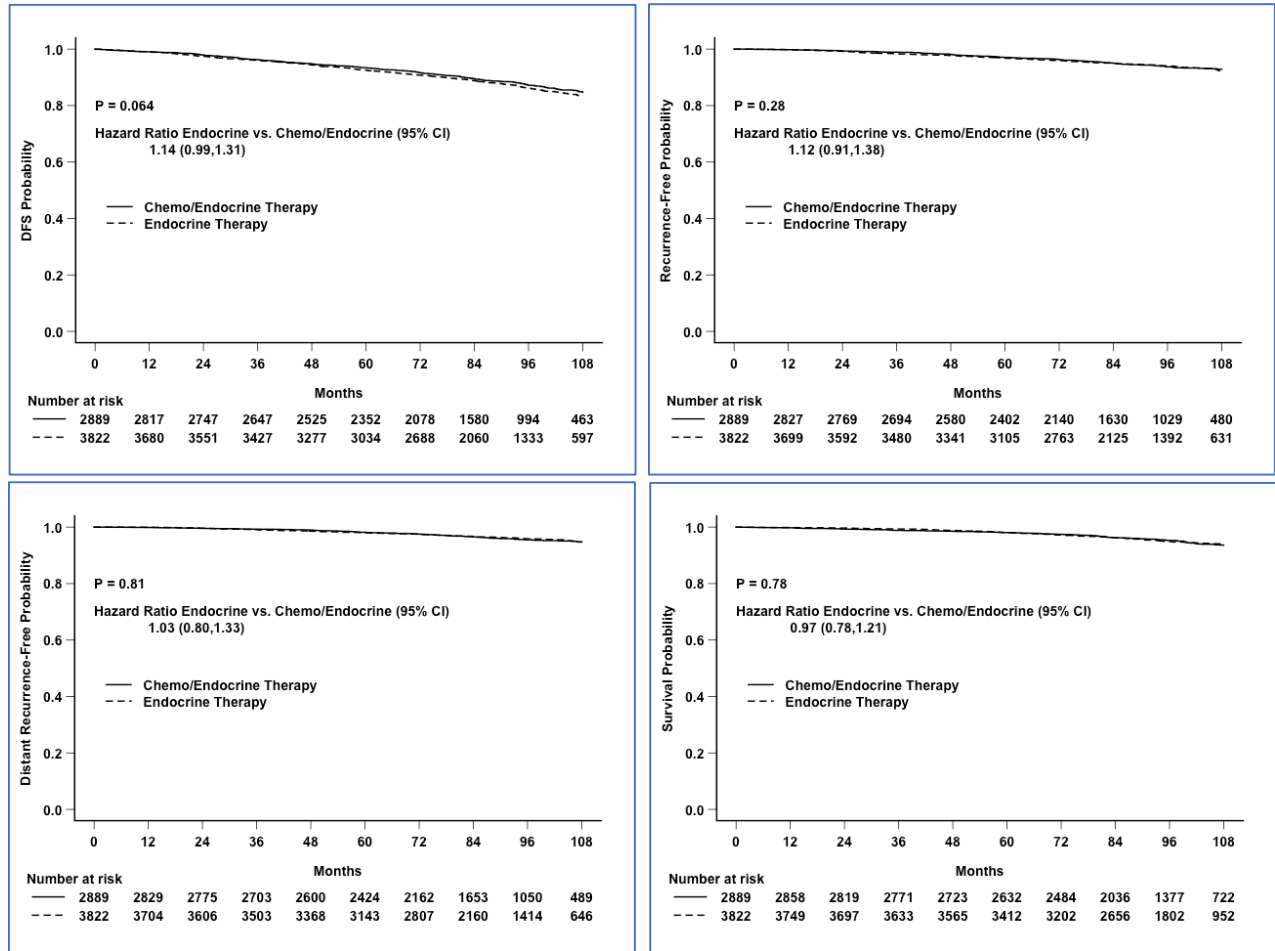

**Figure S3.** Clinical outcomes in RS 11-25 population by treatment received (as-treated analysis).

Kaplan Meier estimates by treatment for endocrine therapy alone and chemoendocrine therapy arms for (a-top left panel) invasive disease-free survival, (b-bottom left panel) freedom from breast cancer recurrence of breast cancer at a distant site, (c-top right panel) freedom from recurrence of breast cancer at a distant or local-regional site, and (d-bottom right) overall survival.

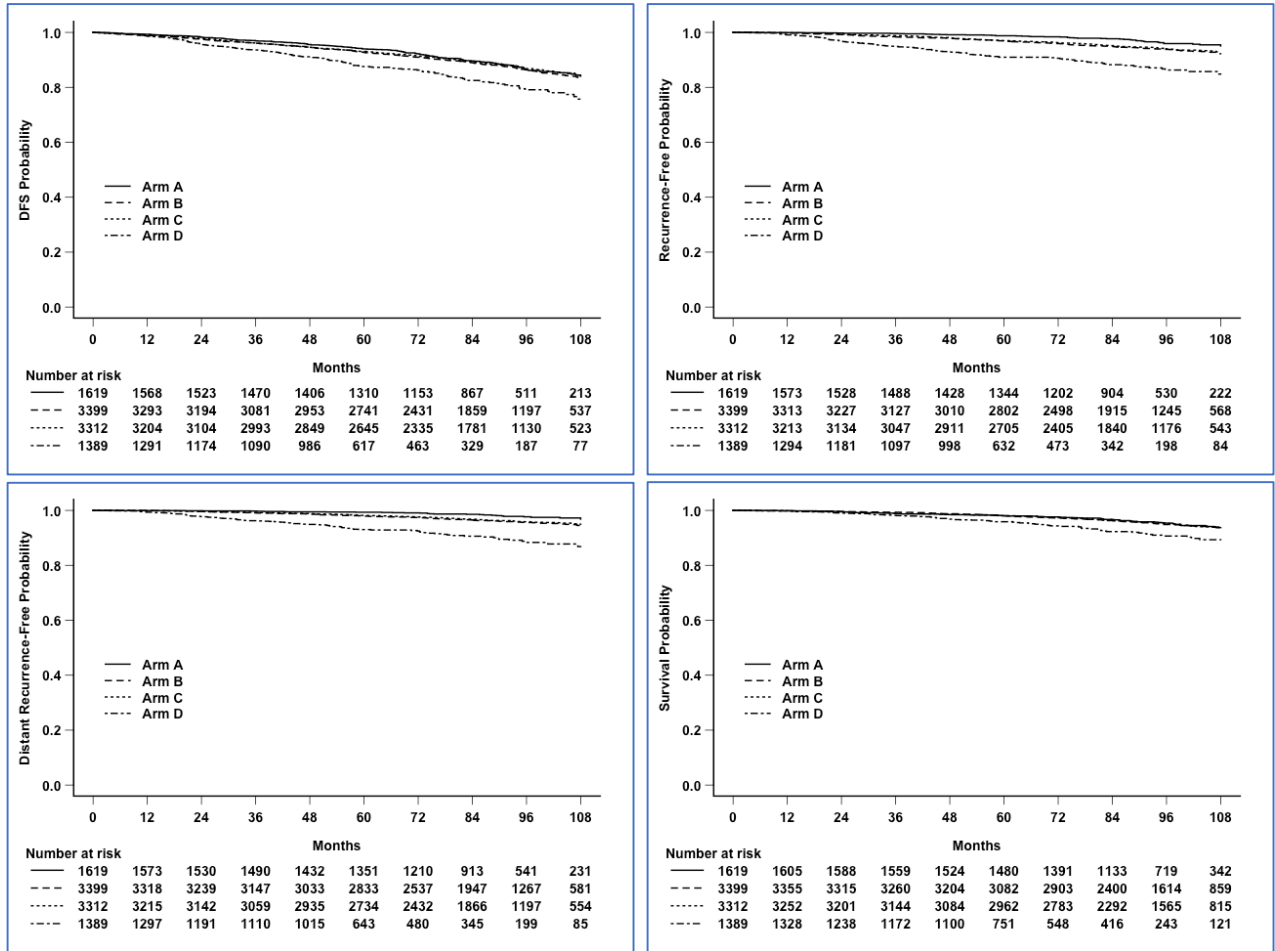

**Figure S4.** Clinical outcomes by assigned treatment in Arms A-D (intention-to-treat analysis). Kaplan Meier estimates by recurrence score for (a-top left panel) invasive disease-free survival, (b-bottom left panel) freedom from breast cancer recurrence at a distant site, (c-top right panel) freedom from breast cancer recurrence at any, and (d-bottom right panel) overall survival ( $p < 0.0001$  for comparison of the 4 arms for all endpoints). (Arm A- RS 0-10 and assigned to endocrine therapy; arm B – RS 11-25 and randomized to endocrine therapy alone; arm C – RS 11-25 and randomized to chemoendocrine therapy; RS 26 or higher and assigned to chemoendocrine therapy).

**Figures S5-10.** Rate of Distant Recurrence by Recurrence Score as a Continuous Function.

The recurrence score was developed and validated specifically to be prognostic for distant recurrence, as described by Paik et al in the original B14 validation study, which included an analysis evaluating the association between continuous recurrence score (RS) and distant recurrence. We therefore also evaluated the relationship between continuous recurrence score and distant recurrence in TAILORx subjects.

As in the main analyses, proportional hazards models were fit. To check for nonproportionality, some models were fit separately for years 0 to 5 and for beyond 5 years. Differences were generally not significant. For example, for patients in the randomized subset, in a model with just continuous RS and treatment arm, the RS slope is 0.115 (standard error 0.024) during the first 5 years and 0.061 (0.022),  $p=0.10$  for the null hypothesis that true slope is the same in both periods.

There are differences in the characteristics of those receiving chemotherapy (for analysis by treatment given), differences in the characteristics of arms A and D compared to B and C (for analyses including these cohorts), and there are also imbalances between randomized arms in some subsets. To avoid confounding with these other factors, most models also incorporated tumor size ( $\leq 2\text{cm}$  vs.  $> 2\text{cm}$ ) and histologic grade (low vs. intermediate vs. high vs. not reported), which were the major prognostic factors for distant recurrence (in addition to RS). The models here were not stratified on the randomization stratification factors. RS was modeled either as a linear term or using a natural spline with 2 degrees of freedom. In all cases, model with the interaction between treatment (either assigned arm or treatment received) and RS (either linear or a natural spline) was fit, and the 9-year distant recurrence rate was estimated as a function of RS and treatment. For models incorporating tumor size and grade, the estimates given are for patients with tumor  $\leq 2\text{cm}$  and intermediate grade, since this constituted the largest group of trial participants for whom there is typically therapeutic equipoise (the estimates for other levels show similar patterns, but with absolute rates shifted up or down). The results are given in the figures S4-9.

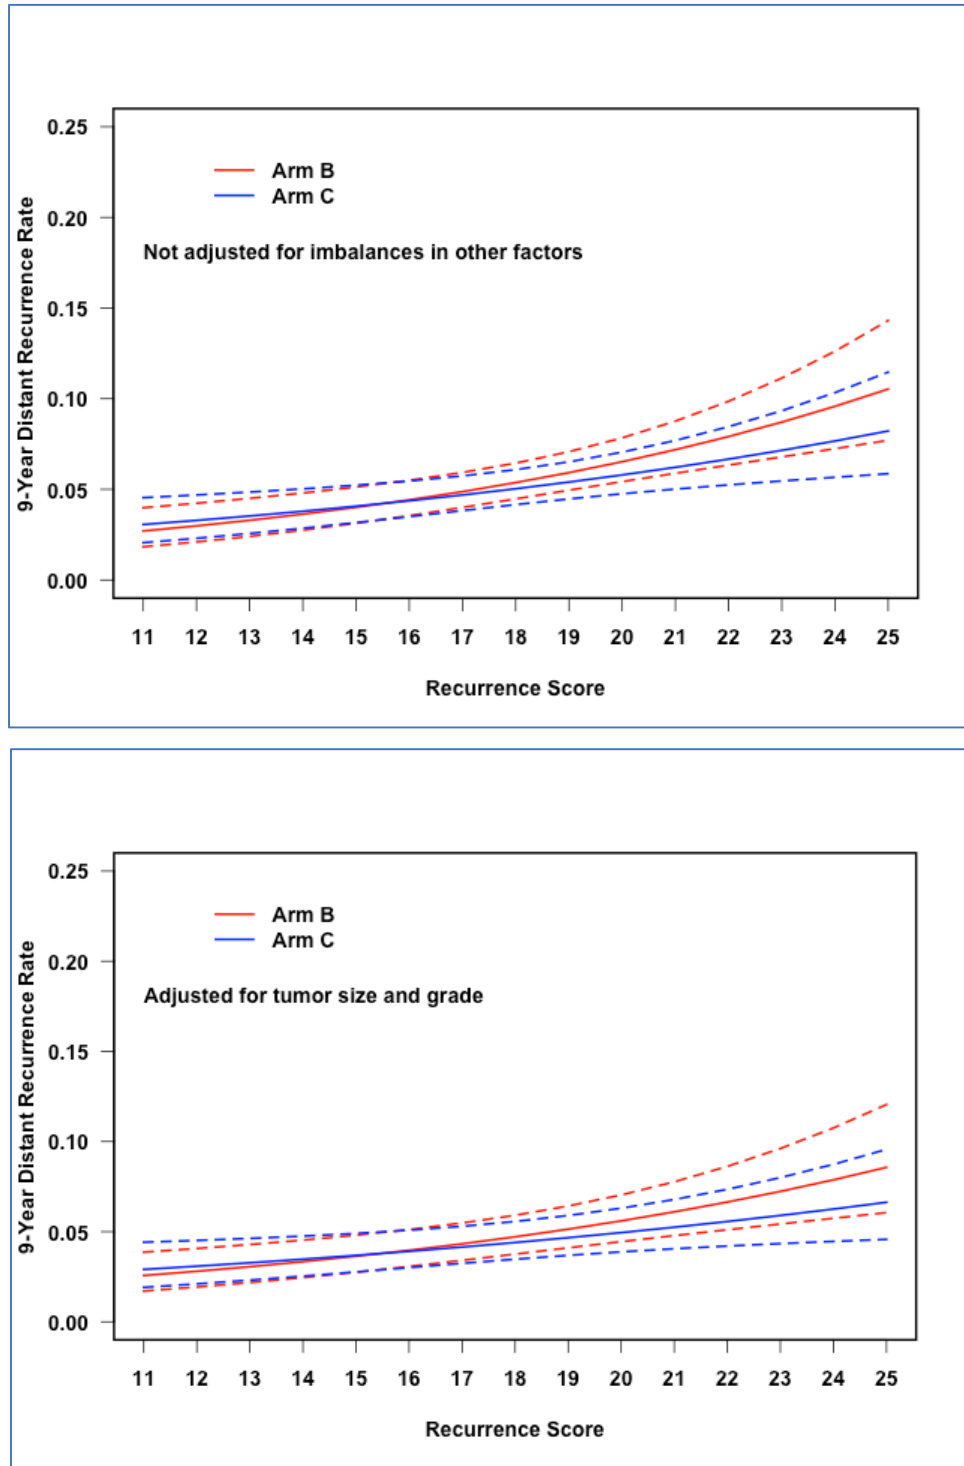

**Figure S5.** Continuous RS 11-25, distant recurrence, and assigned treatment.

9-year distant recurrence with pointwise 95% confidence intervals (dashed lines) by randomized arm and RS (model linear in RS).

Top panel: no adjustment for other factors. Bottom panel: adjusted for grade and tumor size, with the estimated rate given for intermediate grade and tumor size  $\leq 2$ cm.

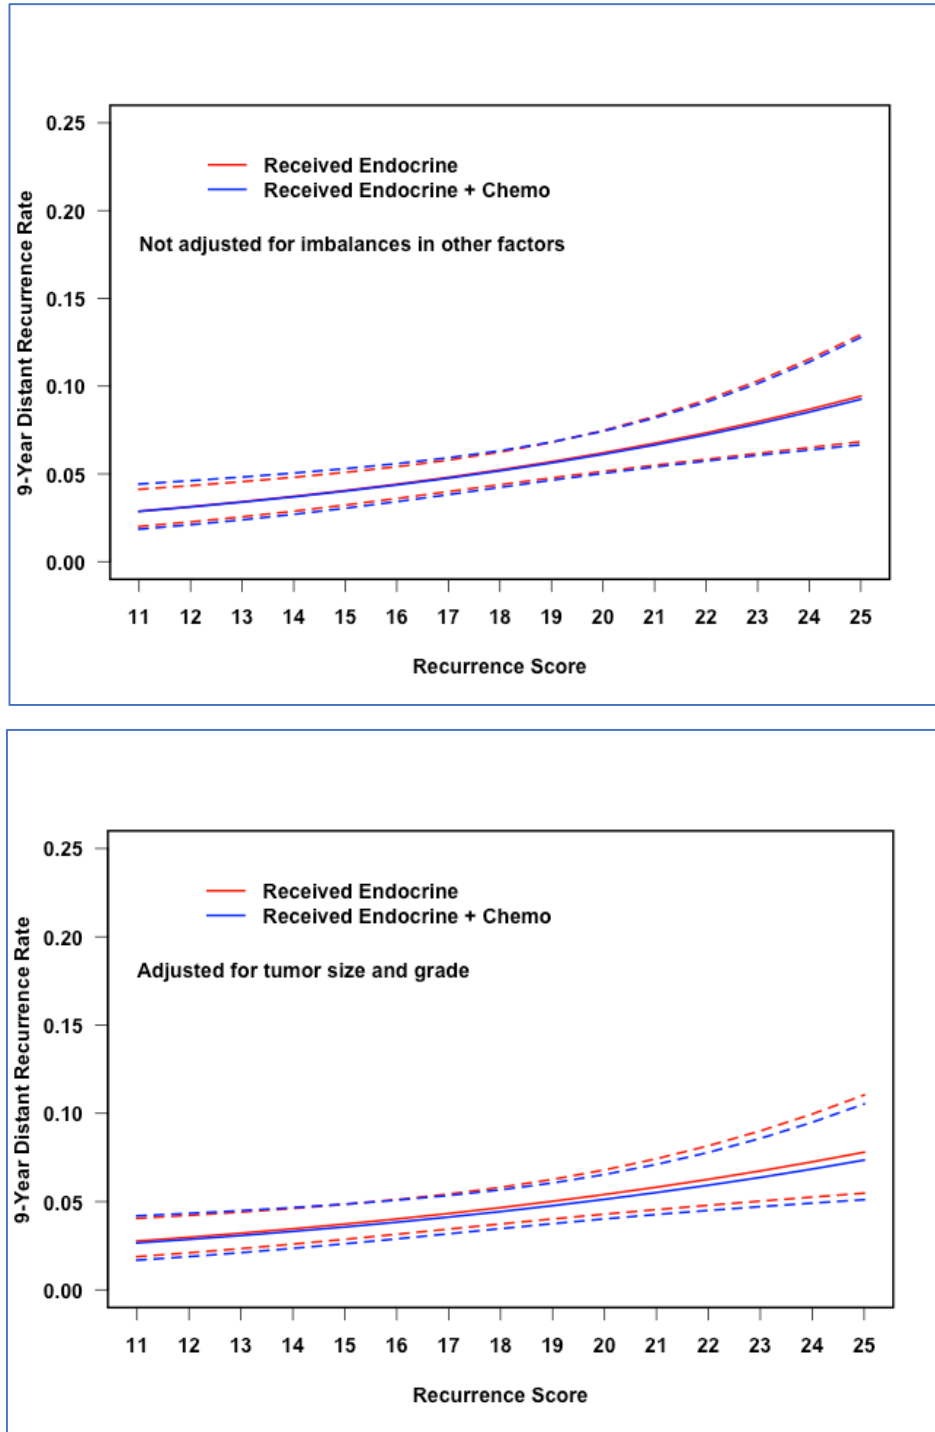

**Figure S6.** Continuous RS 11-25, distant recurrence, and treatment given (as-treated analysis).

9-year distant recurrence with pointwise 95% confidence intervals (dashed lines) by treatment received and recurrence score (model linear in RS), for the RS 11 to 25 population. Top panel: no adjustment for other factors. Bottom panel: adjusted for grade and tumor size, with the estimated rate given for intermediate grade and tumor size  $\leq 2$ cm.

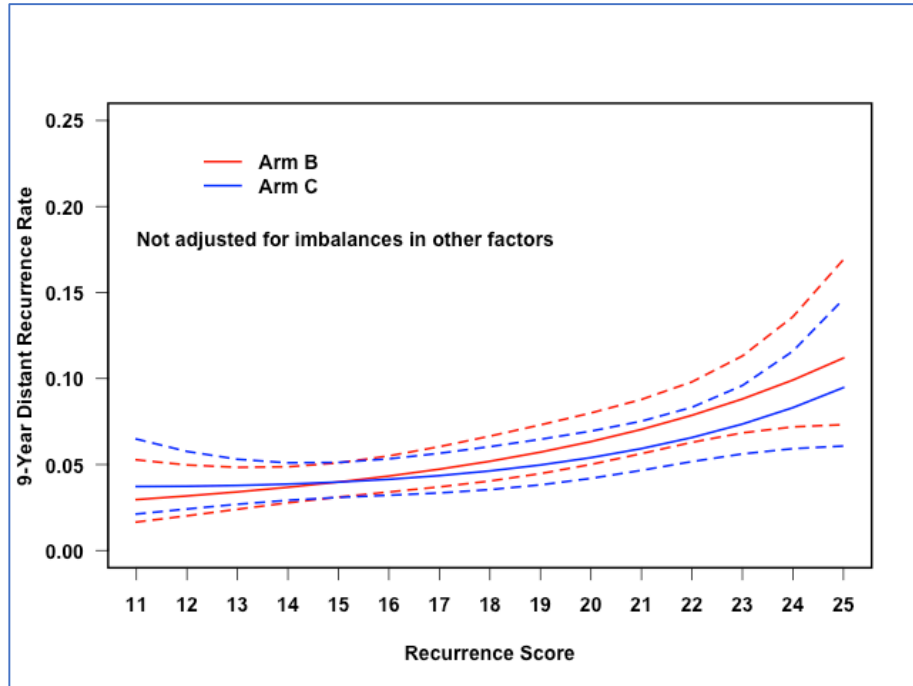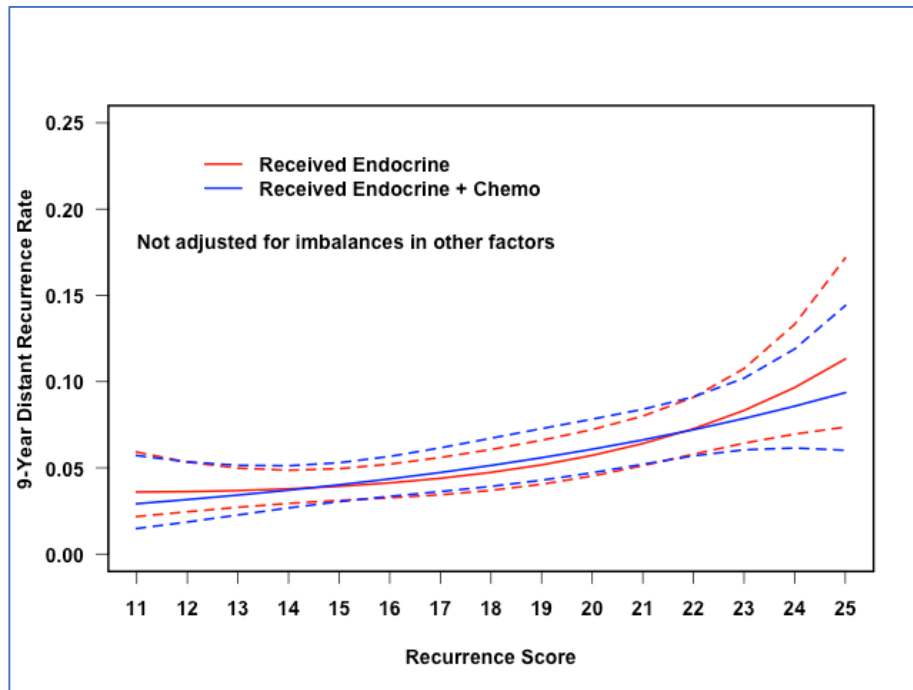

**Figure S7.** Continuous RS 11-25 and distant recurrence unadjusted for other factors (treatment assigned and treatment given).

9-year distant recurrence rates with pointwise 95% confidence intervals (dashed lines) by treatment and recurrence score (RS modeled with a natural spline with 2 degrees of freedom), for the RS 11 to 25 population.

Top panel by treatment arm assigned. Bottom panel by treatment received.

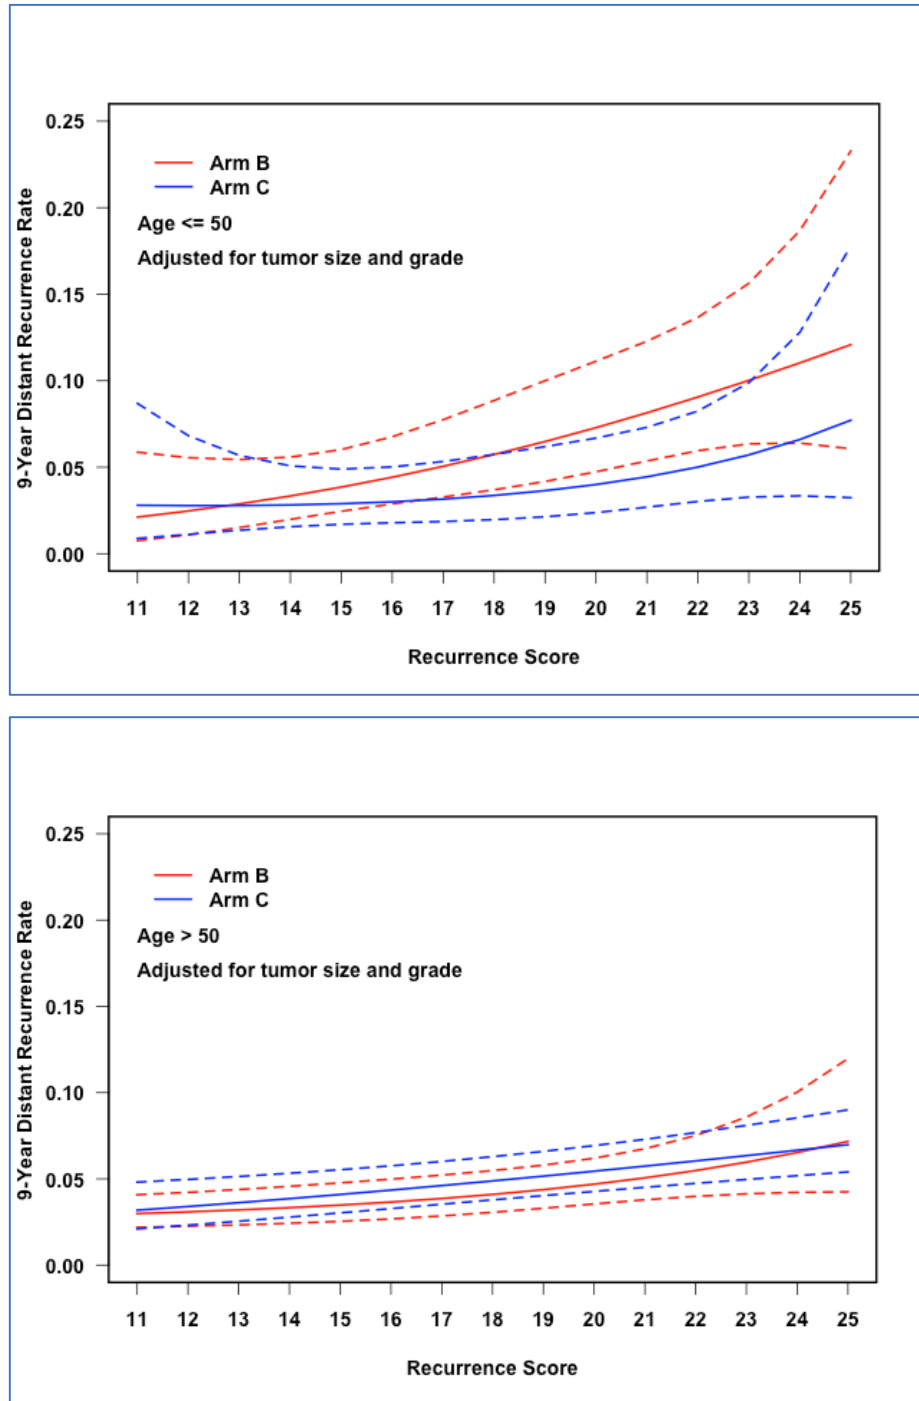

**Figure S8.** Continuous RS 11-25 and distant recurrence by age ( $\leq 50$  vs.  $> 50$  years). 9-year distant recurrence rates by treatment arm assignment, RS, and age (RS modeled with a natural spline with 2 degrees of freedom, adjusted for tumor size and grade).

Top panel, age  $\leq 50$  years. Bottom panel, age  $> 50$  years.



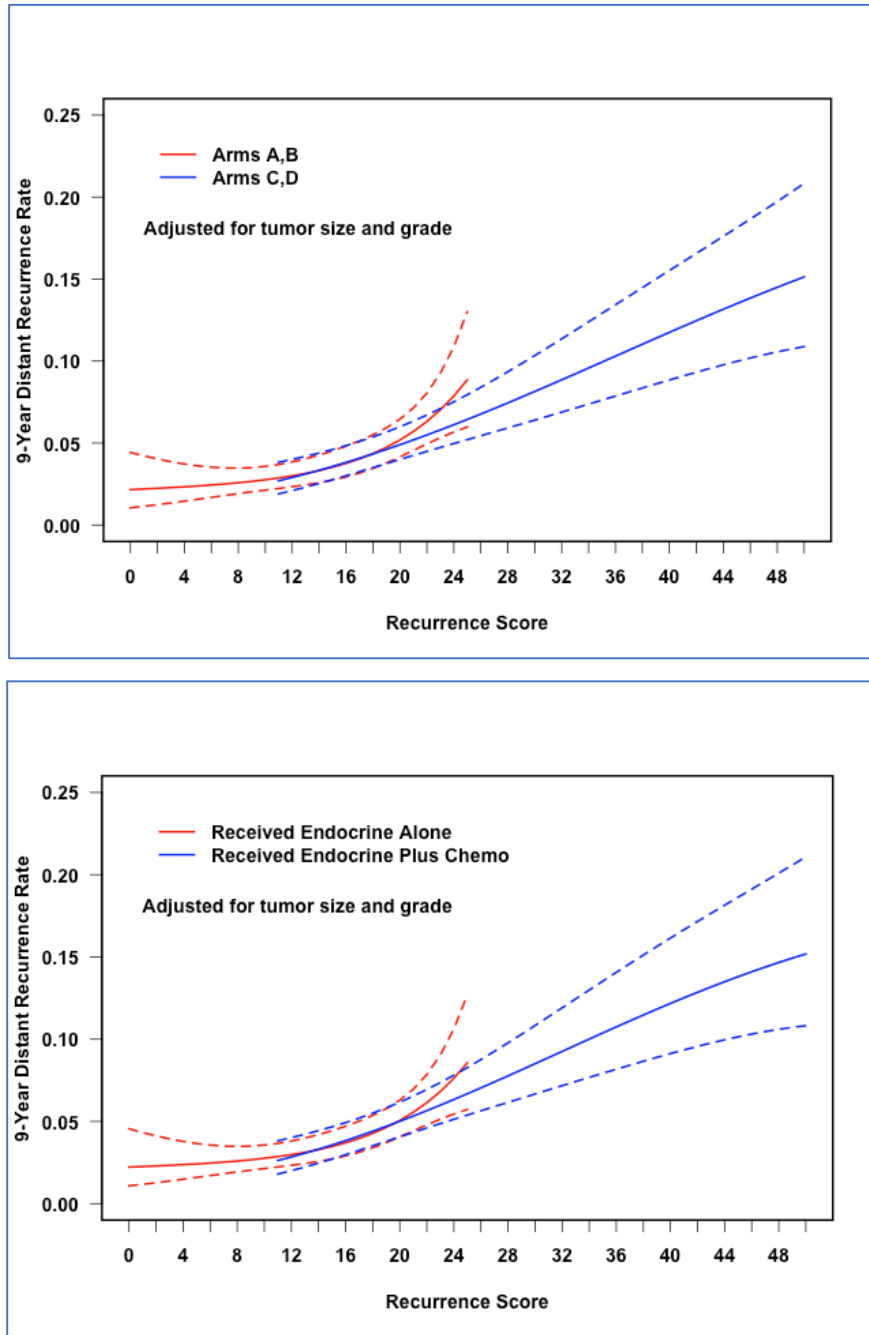

**Figure S9.** Continuous RS and distant recurrence in all treatment arms (by assigned treatment and treatment given).

9-year distant recurrence rates by treatment and recurrence score (RS modeled with a natural spline with 2 degrees of freedom), with the RS 0-10 and RS > 25 groups included with the randomized population. Top panel by treatment arm, adjusted for tumor size and grade. Bottom panel by treatment received, adjusted for tumor size and grade (8 patients with RS < 11 who received chemo and 89 patients with RS > 25 who did not are excluded from the treatment received analysis).

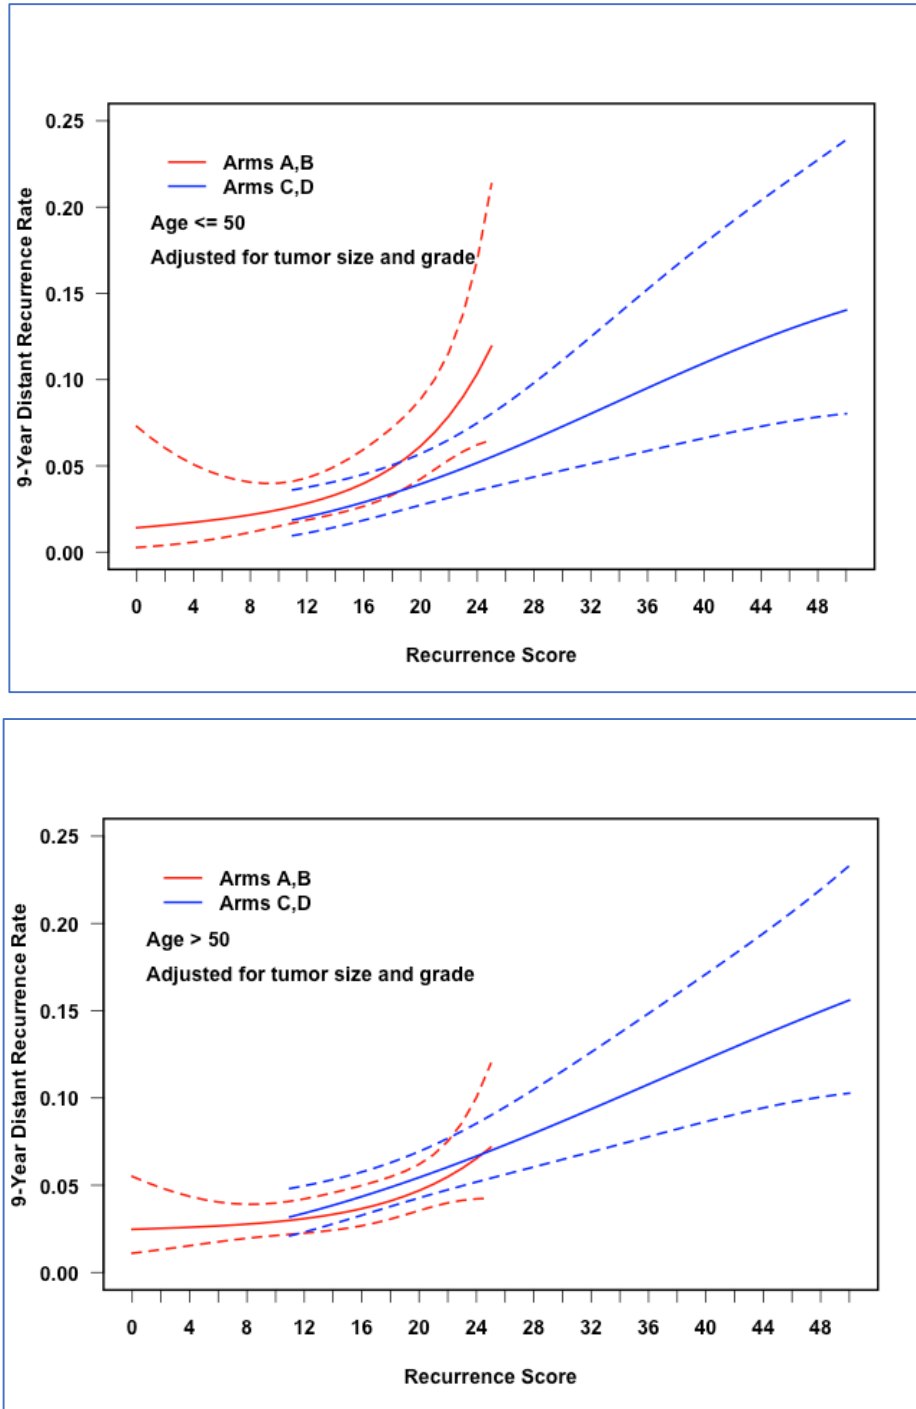

**Figure S10.** Continuous RS and distant recurrence in all assigned treatment arms by age (<= 50 years vs. > 50 years).

9-year distant recurrence rates by treatment arm, RS, and age (RS modeled with a natural spline with 2 degrees of freedom, adjusted for tumor size and grade), with the RS 0-10 and RS > 25 groups included with the randomized population.

Top panel - age <= 50 years. Bottom panel - age > 50 years.

**Figure S11.** Recurrence Score 11 to 25: Subgroup Analysis for Comparison of Assigned Treatment Arms.

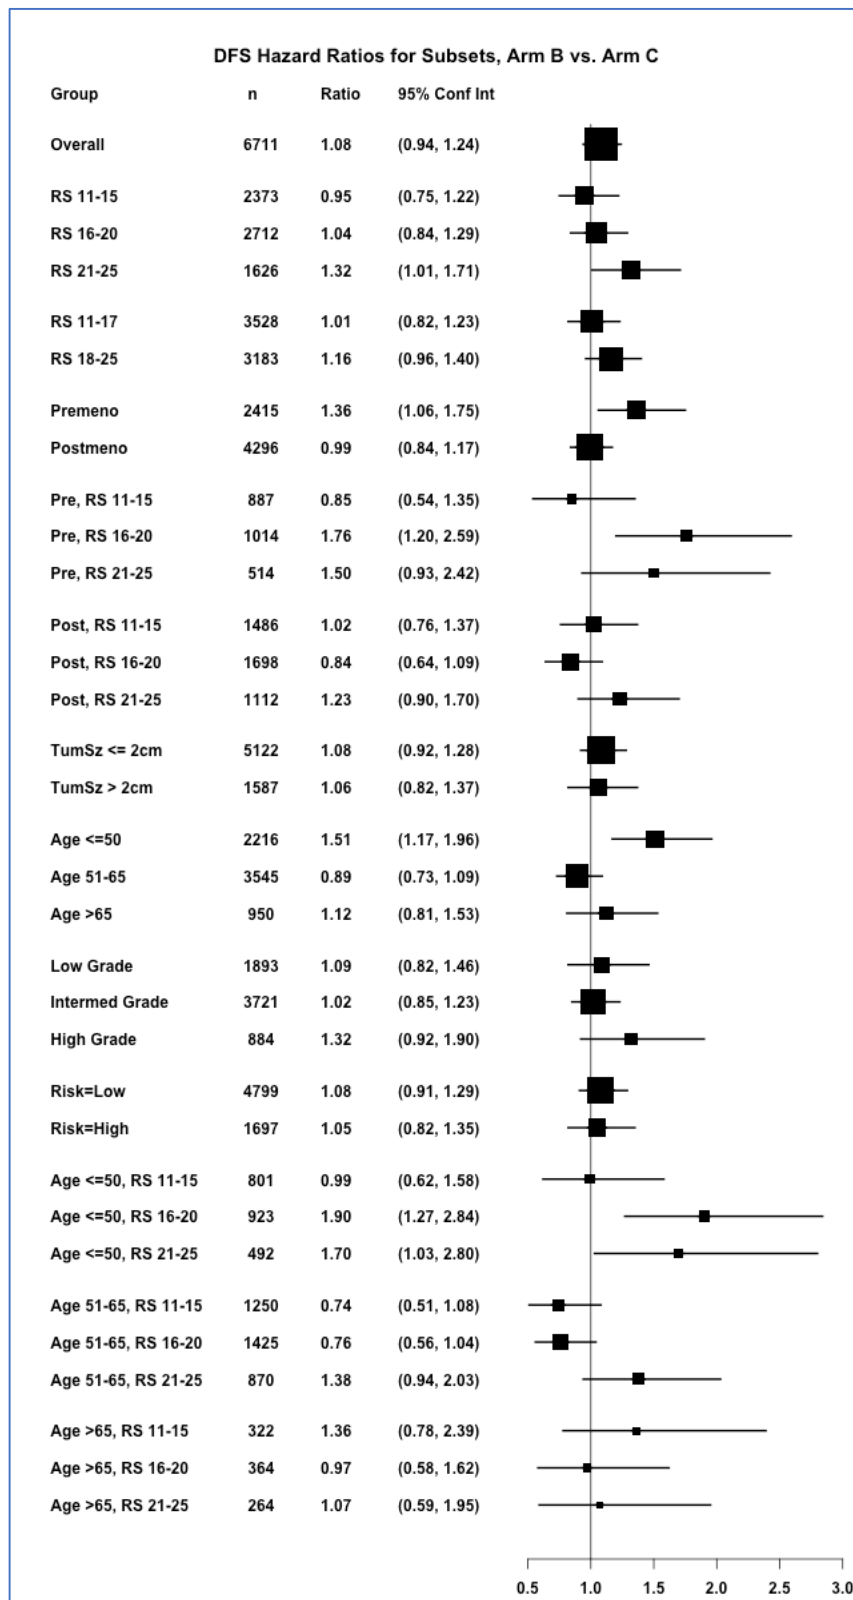

Forest plots showing comparison of outcomes by treatment arm for endocrine therapy alone (arm B) versus chemoendocrine therapy (arm C) for various covariates in the intention-to-treat analysis for invasive disease-free survival, freedom from breast cancer recurrence at a distant site, and freedom from breast cancer recurrence at a distant or local-regional site. Covariates included prespecified stratification factors, including menopausal status (pre, post), tumor size ( $\leq 2$  cm,  $> 2$  cm), and categorical recurrence score (11-15, 16-20, 21-25). Other clinically relevant prognostic covariates examined included age (less than or equal to 50, 51-65, 66 or older), grade (low, intermediate, high), categorical recurrence score using other cutpoints (11-17, 18-25), and clinical risk group as defined in the MINDACT trial (low risk defined by low grade and tumor size  $\leq 3$ cm, intermediate grade and tumor size  $\leq 2$ cm, and high grade and tumor size  $\leq 1$ cm; high risk defined as all other cases with known values for grade and tumor size).

DRFI Hazard Ratios for Subsets, Arm B vs. Arm C

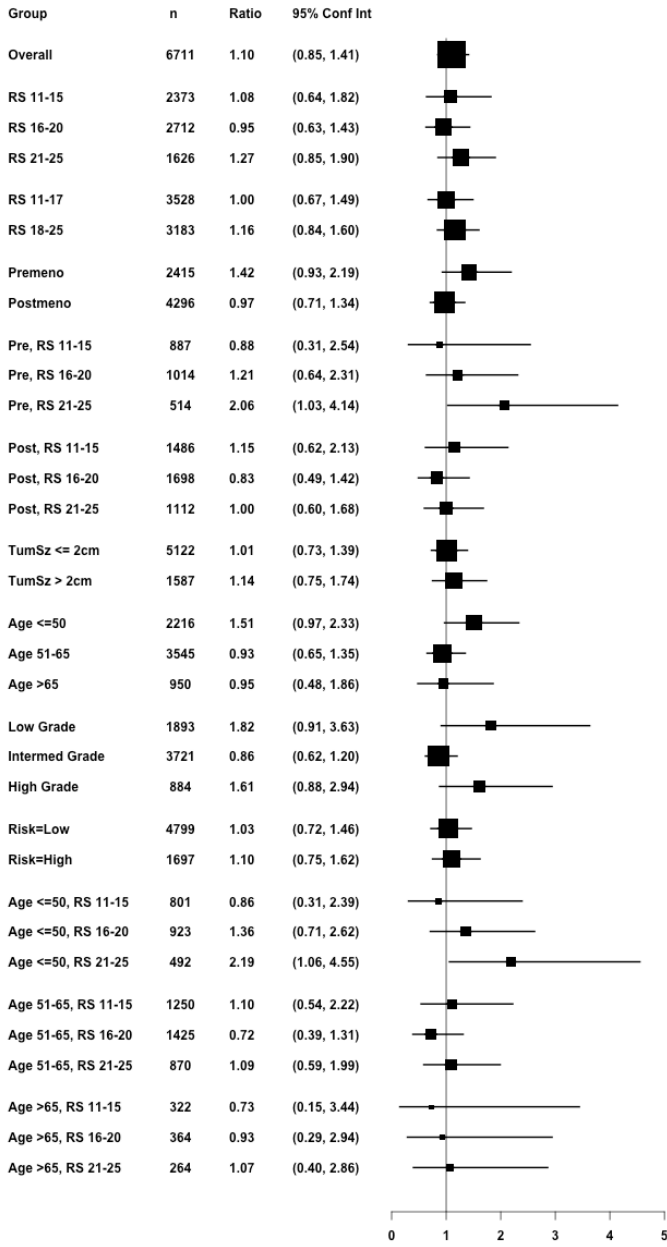

RFI Hazard Ratios for Subsets, Arm B vs. Arm C

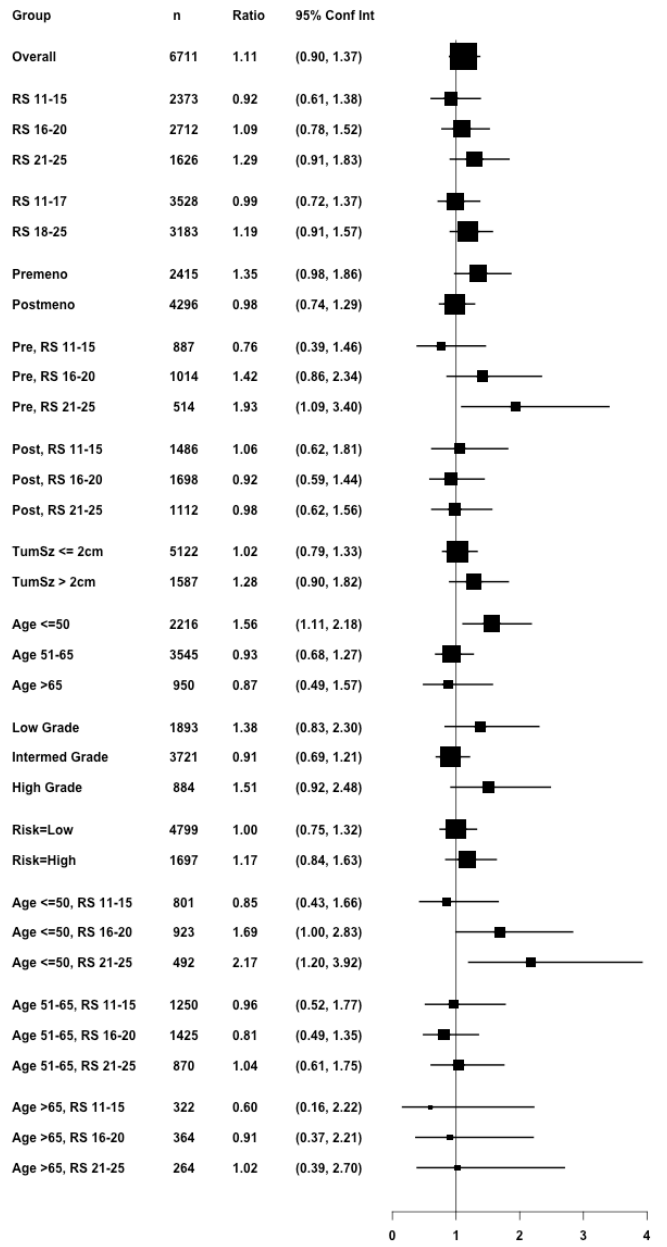

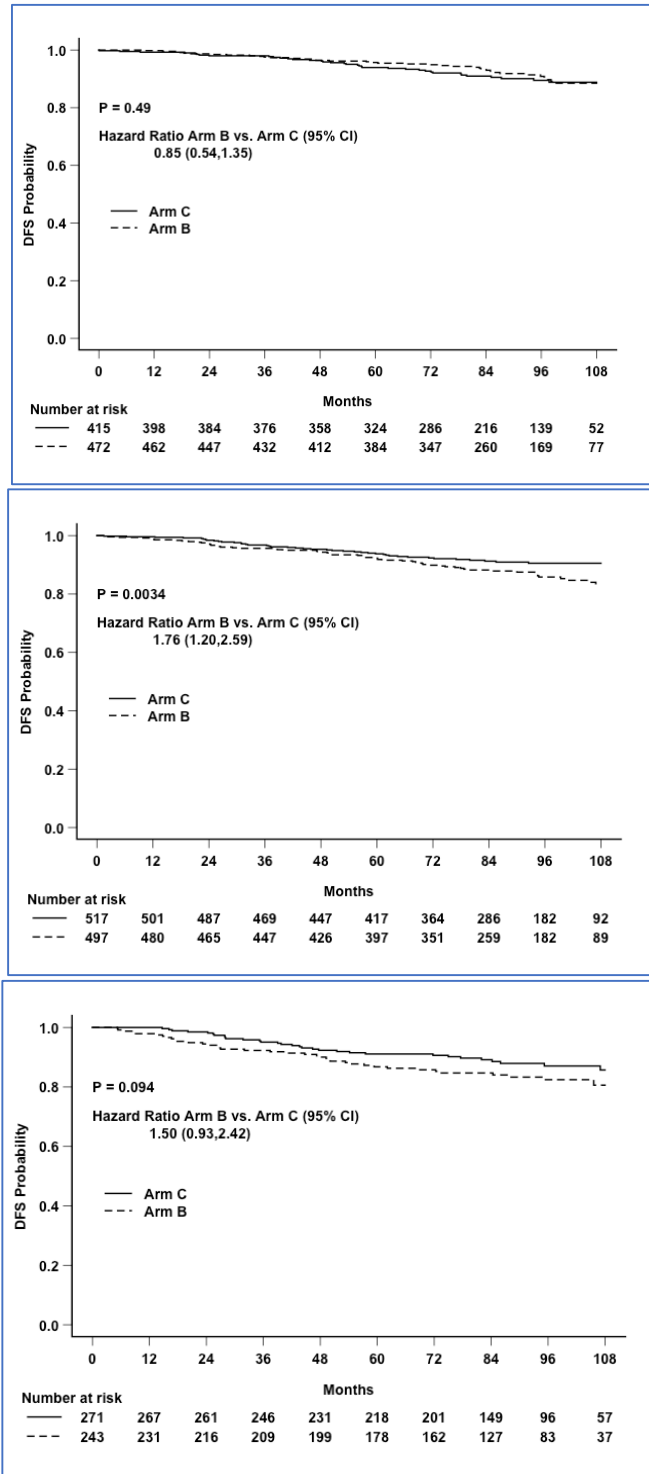

**Figure S12.** Invasive disease-free survival for premenopausal women with RS 11-15, 16-20, and 21-25 by assigned treatment (intention-to-treat analysis) Kaplan Meier estimates by treatment arm for arm B (endocrine therapy alone) and arm C (chemoendocrine therapy).

RS 11-15 (top), RS 16-20 (middle). RS 21-25 (bottom).

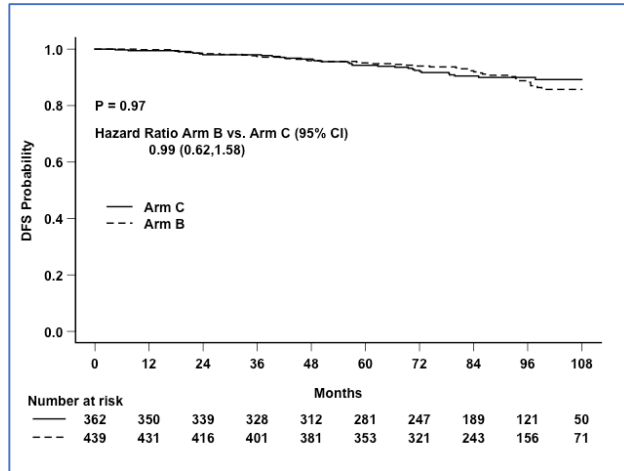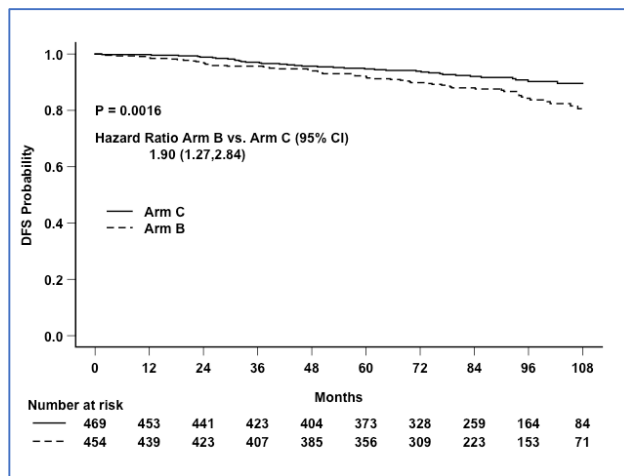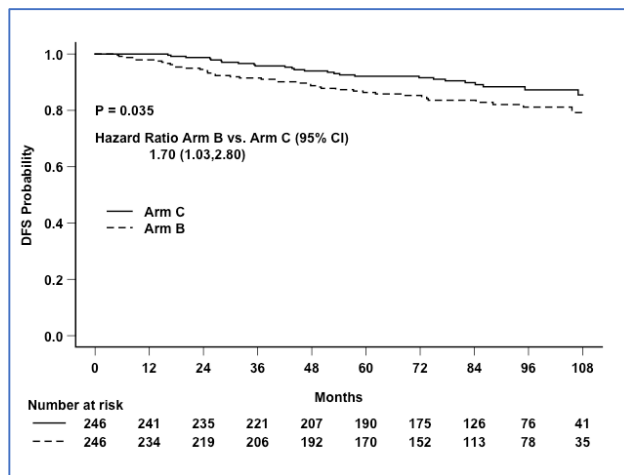

**Figure S13.** Invasive disease-free survival for women  $\leq 50$  years by assigned treatment (intention-to-treat analysis).

Kaplan Meier estimates by treatment arm for arm B (endocrine therapy alone) and arm C (chemoendocrine therapy).

RS 11-15 (top), RS 16-20 (middle), RS 21-25 (bottom).
